# **Methylation of histone H4 lysine 20 by PR-Set7 ensures the integrity of late replicating sequence domains in *Drosophila***

Yulong Li and David M. MacAlpine

Department of Pharmacology and Cancer Biology

Duke University Medical Center

Durham, NC 27710

Correspondence: [david.macalpine@duke.edu](mailto:david.macalpine@duke.edu)

## Abstract

The local chromatin environment is a key regulator of DNA-templated processes including transcription, DNA replication, and DNA repair. The methylation state of lysine 20 on histone H4 (H4K20) has been linked to cell cycle progression, origin recognition complex (ORC) binding, pre-Replication Complex (pre-RC) assembly, and activation of replication origins. Monomethylation of H4K20 (H4K20me1) is mediated by the cell cycle-regulated histone methyltransferase PR-Set7. PR-Set7 depletion in mammalian cells results in defective S-phase progression and the accumulation of DNA damage, which could be partially attributed to a defect in pre-RC formation and origin activity. However, these studies were limited to only a handful of mammalian origins, and it remains unclear how PR-Set7 and H4K20 methylation impact the replication program on a genomic scale. Using *Drosophila* Kc167 cells, we employed genetic, cytological, and genomic approaches to better understand the role of PR-Set7 and H4K20 methylation in regulating DNA replication and governing genome stability. We find that depletion of *Drosophila* PR-Set7 and loss of H4K20me1 result in the accumulation of DNA damage and an ATR-dependent cell cycle arrest. The cell cycle arrest occurs during the second S phase following loss of PR-Set7 activity, suggesting that accumulation of nascent H4K20 is recalcitrant to the DNA replication program. Deregulation of H4K20 methylation had no impact on origin activation throughout the genome; instead, we found that the DNA damage marker, phosphorylated H2A.v ( $\gamma$ -H2A.v), accumulated specifically in late replicating domains in the absence of PR-Set7. We conclude that PR-Set7-mediated monomethylation of H4K20 is critical for maintaining the genomic integrity of late replicating domains.

## Author Summary

The complete and faithful duplication of the genome is essential to ensure normal cell division and organismal development. Post-translational modifications (PTMs) of histones modulate the local chromatin environment and thus have the potential to regulate the transcription and DNA replication programs. A number of histone PTMs, including methylation of lysine 20 on histone H4 (H4K20), have been linked to the regulation of the replication program; however, the majority of these studies have been limited in scope, surveying only a few select loci for origin activity. Here we use genome-wide approaches to comprehensively survey the impact of deregulated H4K20 methylation on the *Drosophila* DNA replication program. Deregulation of H4K20 methylation had no impact on origin activation. In contrast, we found that loss of H4K20 monomethylation results in the accumulation of DNA damage at late replicating sequences in S phase and the activation of the ATR-dependent intra-S phase checkpoint. Together, our data suggest that H4K20 methylation is important for replication fork progression and stability to ensure the integrity of late replicating sequences.

## Introduction

Histone post-translational modifications (PTMs) regulate almost all DNA-templated processes including DNA replication, transcription and DNA repair. Deregulation of these epigenetic histone modifications has the potential to lead to catastrophic consequences at both the cellular and organismal level. One such epigenetic mark, methylation of histone H4 lysine 20 (H4K20), is critical for maintaining genome stability, and its deregulation impacts transcription, chromatin compaction, DNA repair, cell cycle progression, and DNA replication [[reviewed in 1,2,3]].

Monomethylation of H4K20 (H4K20me1) is catalyzed by the histone methyltransferase PR-Set7/Set8, orthologues of which exist in all metazoans [4,5]. H4K20 can also be di- and tri-methylated by the Suv4-20 h1 and h2 homologs in mammalian cells and a single Suv4-20 in *Drosophila* [6,7]. The levels of mammalian PR-Set7 and H4K20me1 are cell cycle regulated. PR-Set7 harbors a conserved PIP-box motif and undergoes PCNA- and CRL4<sup>Cdt2</sup>-mediated degradation during S phase [8–12]. This interaction between the PR-Set7 PIP-box and PCNA is conserved in *Drosophila* cell lines, where the levels of PR-Set7 and H4K20me1 display a similar cell cycle oscillation pattern as seen in mammalian systems [13].

Not only are PR-Set7 and H4K20me1 levels coupled to DNA replication via the PIP-box dependent degradation of PR-Set7, but the DNA replication program is also regulated, in part, by the methylation status of H4K20. Mammalian cells depleted of PR-Set7 are defective in S phase progression, accumulate DNA damage, and activate the DNA damage response [14–16]. Mechanistically, this may be partially attributed to the role of mammalian PR-Set7 in recruiting pre-Replication Complex (pre-RC) components onto chromatin [11], thus promoting the activity of select replication origins. Stabilization of PR-Set7 resulting from the expression of a

degradation resistant PIP-box mutant version of PR-Set7 leads to re-replication [11]. Similarly, *PR-Set7* mutant *Drosophila* neuroblasts show reduced mitotic and S-phase indices [17], and PR-Set7 RNAi treated S2 cells have an increased S-phase population [18]; however, re-replication resulting from PR-Set7 overexpression has not been observed in the fly.

The ability for mammalian PR-Set7 to regulate replication origin activity is dependent on its catalytic function [11] and the presence of Suv4-20h1/h2 which catalyze the di- and tri-methylation of H4K20 [19]. Consistent with this, H4K20me2 and H4K20me3 may function to stabilize ORC binding via the BAH domain of ORC1 or the WD40 domain of LRWD1/ORCA [19–21]. However, H4K20me2 constitutes more than 80% of total histone H4 [7], which implies that 96% of all nucleosomes will contain at least one histone H4 dimethylated at lysine 20. Similarly, trimethylated H4K20 is, for the most part, limited to heterochromatic regions [22,23]. Together, these results suggest that additional mechanisms must exist to specify origin selection in mammalian genomes. Moreover, it is estimated that mammalian cells have more than 40,000 origins of replication [24], while the influence of PR-Set7 on origin licensing has only been examined at a select few origins [11].

Here, we investigate the function of PR-Set7 and H4K20 methylation in regulating the DNA replication program in *Drosophila* Kc167 cells. Similar to mammalian systems, loss of PR-Set7 perturbs the normal cell cycle progression of Kc167 cells, presumably due to the accumulation of unmethylated H4K20 over the course of multiple cell cycles. We show that PR-Set7 depletion results in DNA damage and activation of an ATR-dependent cell cycle checkpoint, implying a defect in DNA replication. However, the genome-wide pattern of replication origin activation is not impaired; instead, we find that late replication domains are specifically sensitive to downregulation of PR-Set7 and accumulate DNA damage. Together, these data suggest that

PR-Set7 and H4K20me1 are critical for maintaining the integrity of late replicating domains in *Drosophila*.

## Results

### H4K20 monomethylation is critical for the completion of the subsequent cell cycle

The methylation state (none, mono-, di- or tri-methylation) of H4K20 has been linked to genome stability and cell cycle progression in a number of model systems [[reviewed in 1]. To assess the impact of H4K20 methylation states on cell cycle progression in *Drosophila* Kc167 cells, we manipulated the levels of the H4K20 methyltransferases, PR-Set7 and Suv4-20 (Fig 1A). Depletion of the monomethyltransferase PR-Set7 with double-stranded RNA (dsRNA) mediated RNAi for 72 hours resulted in a 50% reduction of H4K20me1 levels compared with control RNAi. Conversely, depletion of Suv4-20, which catalyzes di- and tri-methylation of H4K20, resulted in a dramatic increase in H4K20me1 levels. Overexpression of a stabilized PIP box mutant of PR-Set7 (F523A and F524A; PR-Set7<sup>PIPm</sup>) under the control of a copper-inducible metallothionein promoter alone or in combination with depletion of Suv4-20 also resulted in an accumulation of H4K20me1. We also observed a slight increase in H4K20me1 levels relative to control RNAi when simultaneously depleting PR-Set7 and Suv4-20. This slight increase is likely due to differences between the rates of H4K20 monomethylation by PR-Set7 and subsequent dimethylation by Suv4-20.

Cell cycle progression was monitored in parallel by flow cytometry for each of the genetic manipulations described above (Fig 1B). Depletion of PR-Set7 for 72 hours in Kc167 cells resulted in an accumulation of cells with 4N or near 4N DNA content, similar to previous reports in *Drosophila* S2 cells [13]. Interestingly, we also observed an accumulation of cells with 4N

DNA content following the simultaneous depletion of PR-Set7 and Suv4-20 despite the slight increase in H4K20me1. Given that PR-Set7 activity is strictly coupled to the cell cycle and H4K20me1 is a transient epigenetic mark deposited in late S phase and converted to H4K20me2/3 by late mitosis [8,13], we hypothesize that the cell cycle arrest may not be due to the depletion of parental H4K20me1 levels, but rather the accumulation of nascent histone H4.

To test this hypothesis, we examined the kinetics of the cell cycle arrest following PR-Set7 downregulation in synchronized cells (Figs 1C and 1D). Cells were synchronized in G1 by overexpressing the *Drosophila* P27 homolog, Dacapo [25], in the presence of control or PR-Set7 dsRNA. The cells were then released from the Dacapo-induced arrest and allowed to re-enter the cell cycle. In contrast to control cells, cells depleted for PR-Set7 exhibited no increase in H4K20me1 following release from the Dacapo-induced G1 cell cycle arrest (Fig S1). Despite the absence of PR-Set7 and a failure to monomethylate H4K20 during S phase, the cell cycle profile for PR-Set7 RNAi treated cells was indistinguishable from control RNAi treated cells after 24 hours, implying a decoupling of cell cycle progression and H4K20me1 levels. Only after 48 hours did we observe a strong cell cycle arrest. We propose that the monomethylation of nascent H4K20 deposited during S phase is critical for the completion of the next cell cycle.

### **Global H4K20 monomethylation occurs in late S phase**

Cell cycle regulated levels of PR-Set7 start to peak in late S phase with the accumulation of H4K20 monomethylation [8,13]. Recent reports indicate that *Drosophila* PR-Set7 is coupled to the replication fork via an interaction with DNA Pol alpha [13], which may suggest that the accumulation of H4K20 monomethylation in late S phase will be associated with recently replicated sequences. We used cytological and genomic approaches to characterize and monitor the accumulation of H4K20 monomethylation throughout the cell cycle in *Drosophila* Kc167

cells. We first assessed cell cycle position and H4K20 monomethylation at the single cell level in an asynchronous cell population by immunofluorescence (Figs 2A and 2B). The incorporation and distribution of the nucleoside analog, 5-ethynyl-2'-deoxyuridine (EdU), served as a proxy for cell cycle position. Cells lacking EdU were assumed to be in G1 or G2, whereas cells in S phase and undergoing DNA replication were labeled with EdU. *Drosophila* cells in early or late S phase are readily differentiated by the pattern of EdU incorporation throughout the nucleus [26]. Cells in early S phase exhibit EdU incorporation throughout the majority of the nucleus, with the exception of the pericentric heterochromatin which is easily visualized as a “DAPI bright” nuclear focus. In contrast, EdU incorporation is limited to the pericentric heterochromatin during late S phase. We found that cells in early S phase had very low levels of H4K20me1 staining. In contrast, cells in late S phase exhibited significantly elevated H4K20me1 staining throughout the nucleus. Importantly, the increase in H4K20me1 staining was not restricted to the late replicating pericentric heterochromatin, suggesting that the majority of H4K20 monomethylation is decoupled from the replication fork and active DNA synthesis.

To more precisely ascertain the patterns of H4K20 monomethylation, we used chromatin immunoprecipitation coupled with high-throughput sequencing (ChIP-seq) to map H4K20 monomethylation at the beginning or end of S phase. Cells were synchronized at the G1/S transition (early S phase) by treatment with hydroxyurea (HU), an inhibitor of nucleotide reductase. To obtain a synchronous population of late S-phase cells, cells were released from the HU arrest and allowed to progress through S phase for six hours (Fig 2C).

H4K20me1 levels are cell cycle regulated and exhibit their lowest levels in early S phase. Despite only detecting background levels of H4K20me1 by western blot in cells arrested in early S phase at the G1/S transition (Fig 2C), we identified discrete peaks of H4K20me1 enrichment



throughout the genome (Fig 2D). These peaks coincided with transcription start sites and regulatory elements as previously noted (Fig 2E; [27]). In late S phase, in addition to enrichment of H4K20me1 at regulatory elements (Fig 2D), we also observed a global increase in H4K20me1 in both genic and intergenic sequences throughout the *Drosophila* genome (Fig 2F). As an alternative approach to isolate cell populations in early or late S phase, we used cell sorting. Chromatin was isolated from these distinct cell populations and the genome-wide distribution of H4K20me1 was determined for early and late S phase. The results were similar to the HU treated samples (Fig S2). Together, these results indicate that monomethylation of H4K20 by PR-Set7 is not limited to replication forks but occurs throughout the genome in late S phase.

### **Loss of *Drosophila* PR-Set7 induces DNA damage and activates the ATR checkpoint**

Loss of PR-Set7 results in an altered cell cycle distribution with an accumulation of cells with greater than 2N DNA (Fig 1B; [13,15]), suggesting the activation of the DNA damage response. Prior experiments investigating the occurrence of PR-Set7-mediated DNA damage by immunostaining of the phosphorylated histone H2A.v ( $\gamma$ -H2A.v, the *Drosophila* homolog of H2AX) led to conflicting results [13,17,18]. The discrepancy in whether or not DNA damage accumulates in PR-Set7 depleted or mutant cells may, in part, result from the specificity of the antibodies used to detect  $\gamma$ -H2A.v. Using a recently developed monoclonal anti- $\gamma$ -H2A.v antibody [28], we observed an increase in the number and intensity of  $\gamma$ -H2A.v foci when Kc167 cells were depleted of PR-Set7 by RNAi treatment for 72 hours (Figs 3A, S3A and S3B). The observed increase in  $\gamma$ -H2A.v resulting from PR-Set7 depletion was supported by the direct detection of double-strand DNA breaks (DSBs) using a neutral DNA comet assay (Figs 3B and 3C).

The accumulation of DNA damage in the absence of PR-Set7 activity led us to test the role of ATM and ATR in mediating the cell cycle arrest. As previously reported [17], we found that depletion of ATR abrogated the checkpoint and cell cycle arrest due to loss of PR-Set7. In contrast to the co-depletion of ATR and PR-Set7, loss of ATM and PR-Set7 had no impact on the cell cycle arrest (Fig 3D). To confirm the efficacy of ATM RNAi, we tested its ability to reduce the phosphorylation of H2A.v when cells were stressed with methyl methanesulfonate (MMS), a strong DNA damaging agent. While ATR or ATM dsRNA alone did not reduce the levels of  $\gamma$ -H2A.v detected by immunofluorescence, the downregulation of both significantly reduced the H2A.v phosphorylation that occurred in response to MMS (Fig S3C). We propose that PR-Set7 depletion in *Drosophila* Kc167 cells results in aberrant DNA replication which activates the ATR-dependent intra-S checkpoint.

### ***Drosophila* H4K20 methylation states do not affect replication origin activity**

In mammalian systems, PR-Set7 is thought to regulate pre-RC assembly and origin activation [11], presumably dependent on Suv4-20h1/h2 mediated di- or trimethylation of H4K20 [19]. We first hypothesized that loss of PR-Set7 may activate the ATR-dependent intra-S phase checkpoint due to aberrant (reduced) origin activation. We used BrdU-seq to map the genome-wide origin activation profile [29]. Briefly, we incubated asynchronous cells with dsRNA targeting PR-Set7 or a control sequence for 36 hours before adding HU for 4 hours to inhibit active replication forks. We then added BrdU (in the presence of HU) for another 16 hours. This provided the cells sufficient time to enter the second cell cycle following RNAi treatment so that most cells would be arrested at the second G1/S transition, and only those sequences proximal to early activating origins would incorporate BrdU. As expected, the BrdU incorporation observed in both the control and PR-Set7 depleted cells peaked at ORC binding

sites (Fig S4). However, we found no statistical difference in early origin activation between control or PR-Set7 depleted cells (Figs 4A and 4B).

We next considered the hypothesis that PR-Set7 depletion might impair late origin activation. To test this hypothesis, we co-depleted PR-Set7 and ATR in the presence of HU and BrdU. ATR depletion and abrogation of the intra-S phase checkpoint permitted the activation of late and/or dormant origins in addition to early origins. However, the origin activation profile upon co-depletion of ATR and PR-Set7 was indistinguishable from the depletion of ATR alone (Figs 4A and 4B). These results suggest that the cell cycle arrest following depletion of PR-Set7 is not due to a defect in origin activation.

Finally, deregulation of PR-Set7 by overexpression results in DNA re-replication and DNA damage in mammalian cells [11]. However, *Drosophila* PR-Set7<sup>PIPm</sup> overexpression did not lead to re-replication, nor did Suv4-20 RNAi result in any cell cycle defects (Fig 1B). To test if any of these conditions might impact origin activation while keeping the cell cycle progression intact, we performed BrdU-seq in the presence of HU as described above. We detected no significant perturbations in the distribution or activity of replication origins throughout the genome (Fig 4B). We conclude that deregulation of H4K20 methylation does not directly impact replication origin activity in *Drosophila*.

### **Loss of PR-Set7 accumulates DNA damage in late replicating domains**

Since replication origin activity was not impacted by PR-Set7 depletion, we hypothesized that the DNA damage lesions (Fig 3) may occur during replicative stress and result from collapsing replication forks. The presence of DNA breaks marked by  $\gamma$ -H2A.v provided an opportunity to identify the genomic locations and features associated with DNA damage resulting from the loss

of PR-Set7. We used ChIP-Seq to identify the genome-wide distribution of  $\gamma$ -H2A.v. The control and PR-Set7 depleted samples exhibited numerous  $\gamma$ -H2A.v peaks (Fig S5), presumably reflecting endogenous replication- and transcription-mediated stress [30]. In order to identify the genomic locations specifically enriched for  $\gamma$ -H2A.v by PR-Set7 depletion, we normalized the  $\gamma$ -H2A.v signal by calculating the log<sub>2</sub> difference in signal between PR-Set7 and control RNAi treated samples (see Materials and Methods). Following normalization, we observed discrete domains of elevated  $\gamma$ -H2A.v throughout the genome (Fig 5A). The vast majority of  $\gamma$ -H2A.v enriched domains were associated with late replicating sequences and were inversely correlated with replication timing data (Pearson correlation = -0.696; Figs 5A and 5B; [31]). We used a Hidden Markov model to define 102  $\gamma$ -H2A.v domains and compared them with the replication timing domains identified in a prior study [31]. We found that 88 of the  $\gamma$ -H2A.v domains overlapped with a late replicating domain while 120 of the 166 late replicating domains coincided with a  $\gamma$ -H2A.v domain (Table S1). We did not observe hotspots of  $\gamma$ -H2A.v within the late domains, but rather found that  $\gamma$ -H2A.v spanned the entire late domain region (Fig 5C). Given that ChIP-seq is a population-based assay averaged over millions of cells, the lack of discrete  $\gamma$ -H2A.v 'hotspot' peaks within the late replicating domains implies a spatial pattern of stochastic DNA damage likely resulting from replication fork collapse in the absence of H4K20me1.

## Discussion

Depletion of PR-Set7 in *Drosophila* Kc167 cells results in a decrease in H4K20 monomethylation, activation of an ATR-dependent checkpoint, and a cell cycle arrest in late S phase. The activation of the ATR-dependent checkpoint was accompanied by the accumulation of DNA damage. We found that PR-Set7 and H4K20 monomethylation of nascent histones were not required to complete the first S phase, but rather cells entering their second cell cycle failed

to complete S phase likely due to the accumulation of unmodified histone H4K20 during the previous cell cycle. Unlike in mammalian cells, the accumulation of unmodified histone H4K20 did not impact origin activation. The failure to complete S phase is associated with the enrichment of  $\gamma$ -H2A.v in late replicating domains, suggesting that H4K20 methylation is critical in maintaining the integrity of late replicating sequences.

H4K20 is the most common histone target for post-translational modification. The vast majority (>80%) of H4K20 exists in the dimethyl state [7]; therefore, every cell cycle the bulk of nascent histone H4 deposited during DNA replication needs to undergo monomethylation by PR-Set7 and subsequent di- or tri- methylation by Suv4-20. The conserved PIP-box mediating the PCNA and CRL4<sup>Cdt2</sup> dependent degradation of PR-Set7 tightly couples PR-Set7 activity to the cell cycle. PR-Set7 globally monomethylates the nascent pool of H4K20 on lysine 20 in late S phase. Depletion of PR-Set7 in G1 and loss of late S phase specific H4K20 monomethylation had no impact on the progression through S phase in the first cell cycle, indicating that there is not an immediate “just in time” requirement for H4K20me1 to complete S phase or enter into mitosis. DNA damage and cell cycle arrest occur in the next cell cycle with the accumulation of nascent nucleosomes containing unmodified H4K20 throughout the genome (Fig 6).

DNA damage resulting from loss of PR-Set7 and H4K20 methylation was restricted to late replicating regions of the genome, suggesting a defect in the DNA replication program at the end of S phase. A paucity of activated origins has been shown to lead to DNA damage, fragile sites, and increased mutations in human cells due to the increased distances replication forks must traverse [32–34]. However, unlike in mammalian cells, deregulation of H4K20 methylation did not impair origin activation in *Drosophila*. In mammalian cells, tethering of PR-Set7 to the DNA promotes the locus-specific recruitment of replication factors and pre-RC assembly (presumably

via increased levels of H4K20me2 and ORC stabilization) [11,19,20]. However, given that almost all nucleosomes contain at least one histone H4 methylated at lysine 20, it is difficult to envision how tethering could lead to a greater local concentration of H4K20me2. It remains to be seen if the locus-specific effects observed at select origins in mammalian cells will represent a genome-wide paradigm [11].

Loss of PR-Set7 leads to a cell cycle arrest with nearly 4N DNA content. Depletion of the putative DNA damage checkpoint ATM did not relieve the cell cycle arrest. This may be due to the dispensable role of *Drosophila* ATM in maintaining the premitotic-checkpoint in response to DNA damage [35,36]. Instead, depletion of ATR activity relieved the checkpoint and cell cycle arrest suggesting that loss of PR-Set7 and H4K20 methylation activate the ATR-dependent intra-S phase checkpoint. The checkpoint is likely activated due to the accumulation of ssDNA and/or DSBs resulting from replication fork stalling and collapse (Reviewed in [37]). We found that the DNA damage resulting from loss of PR-Set7 accumulates in late replicating regions of the *Drosophila* genome. We also found that the pattern of  $\gamma$ -H2A.v marked DNA damage was broadly distributed across late replicating domains suggesting a model whereby the accumulation of unmodified H4K20 may render the chromatin recalcitrant to replication fork progression resulting in stochastic replication fork collapse.

Why is *Drosophila* PR-Set7 and H4K20 methylation critical for the integrity of late replicating domains? In contrast to early replicating domains which are enriched for activating chromatin PTMs, late replicating regions of the genome are generally gene-poor and depleted of most chromatin PTMs [29,38]. Thus, H4K20me1 may be a critical epigenetic mark to maintain proper chromatin architecture of late replication domains. Consistent with this hypothesis, H4K20me1 is necessary to ensure proper chromatin compaction [18,39]. Loss of PR-Set7 leads to altered

nuclear morphology; specifically, an enlarged nucleus due to abnormal chromatin decompaction (Fig 3A; [18]). Together, these results suggest that normal chromosome compaction is a determinant of replisome stability and fork progression.

Alternatively, H4K20 methylation may be required for repairing and restarting spontaneous stalled replication forks which are more likely to be enriched in late replication regions (Reviewed in [40]). H4K20me2 has been implicated in interacting with 53BP1 in mammalian cells, which promotes the non-homologous end-joining (NHEJ) pathway to repair DNA DSBs and antagonizes the homologous recombination (HR) pathway factor BRCA1 [41,42]. It is proposed that PR-Set7 deposits *de novo* monomethylation marks on H4K20 flanking DSBs, which provide substrates for sequential conversion to H4K20me2 by Suv4-20h1 [43,44]. In mammalian U2OS cells, depletion of either an HR factor, Rad51, or an essential replication factor, Cdc45, eliminated the accumulation of  $\gamma$ -H2AX induced by PR-Set7 siRNA [14]. These results suggest that PR-Set7 activity may promote NHEJ over HR during S phase. However, co-depletion of PR-Set7 and the *Drosophila* Rad51 or BRCA2 homolog had no impact on reducing the intensity of  $\gamma$ -H2A.v by immunofluorescence in our system (Fig S6). Also, loss of *Drosophila* Suv4-20 had little if any impact on the cell cycle progression of Kc167 cells (Fig 1B) or animal survival [45]. This may reflect the variability of the replicative stress response pathways across species, or likely a less essential role of H4K20me2 in *Drosophila*, despite it being the most abundant form of H4K20 [7].

PR-Set7 is essential for development. Loss of PR-Set7 in mice leads to embryonic lethality prior to the eight-cell stage [39]; similarly, flies homozygous null for PR-Set7 die as third instar larvae [46]. While it has been assumed that the essential function of the PR-Set7 methyltransferase is to monomethylate H4K20, it remains possible that it could target other critical proteins for

methylation. Indeed, nonhistone targets of PR-Set7's catalytic activity have been identified in mammalian cells, including p53 [47] and PCNA [48], both of which are critical cell cycle regulators.

Recently, McKay and colleagues developed a novel histone replacement system to directly assess the function of specific histone lysine residues in *Drosophila* [49]. Strikingly, more than half of the flies harboring a mutation of histone H4 lysine 20 to alanine (H4K20A), although sick, were able to survive into adulthood. H4K20A mutant flies also exhibited robust EdU incorporation in germline nurse and somatic follicle cells, which is consistent with our findings that origin activation is not impacted by loss of PR-Set7 activity. Despite the tight cell cycle-coupled regulation of PR-Set7, we found that depletion of PR-Set7 and loss of H4K20 monomethylation did not impair the first S phase but rather impacted the subsequent cell cycles. While we cannot completely rule out the possibility that it may take more than 24 hours for a PR-Set7 methylated non-histone protein to turn over, we suggest that cell cycle arrest in subsequent cell cycles is an epigenetic effect coupled to the accumulation of unmodified H4K20 on the chromatin. What is unclear, is precisely how much H4K20 methylation throughout the genome is required to maintain genomic stability? In the case of the H4K20A mutant flies, it remains possible that the incorporation of minimal amounts of the replication independent histone H4, His4r, (which was not mutated) may be sufficient to prevent the accumulation of DNA damage during late S phase. Finally, the majority of tissues derived from differentiated cells in the fly are polyploid resulting from developmentally programmed endocycles [50]. These cells have under-replicated regions which frequently correspond with late replicating domains [51] and are de-sensitized to the DNA damage response pathway [52]. Thus, H4K20 methylation may have a minimal impact on cells that are predisposed to fail to replicate and/or activate the DNA damage response in late replicating regions of the genome.



## Materials and Methods

### *Drosophila* cell culture

*Drosophila* Kc167 cells were cultured at 25°C in Schneider's Insect Cell Medium (Invitrogen) supplemented with 10% heat-inactivated fetal bovine serum (Gemini) and 1% penicillin/streptomycin/glutamine (Invitrogen). Dacapo and PR-Set7<sup>PIPm</sup> were cloned into the pMK33 plasmid under the control of a Cu<sup>2+</sup> inducible metallothionein promoter and transfected into Kc167 cells with the Effectene Transfection Reagent (Qiagen). Two days after transfection, cells were selected and maintained with 0.125 µg/ml Hygromycin B (Sigma). To arrest cells in G1, Dacapo was overexpressed with 1 mM copper sulfate for 24 hours. Similarly, PR-Set7<sup>PIPm</sup> was induced with 0.5 mM copper sulfate. To arrest cells at the G1/S transition, 1 mM hydroxyurea (Sigma) was added for 24 hours (unless otherwise noted).

### Double-strand RNA synthesis and RNA interference

Double-strand RNAs (dsRNAs) were generated by *in vitro* transcription (Promega T7 RiboMax) from 400-800 bp PCR products representing the target gene. Target sequences were flanked by T7 promoters on both strands. Primer sequences used are found in Table S2. To perform RNAi, cells were washed and diluted in serum-free medium to a concentration of 2 × 10<sup>6</sup> cells/ml, and 15 µg dsRNA per 10<sup>6</sup> cells was added and incubated for one hour before diluting cells to 1 × 10<sup>6</sup> cells/ml with 2x medium. The cells were then incubated at 25°C for 24-72 hours.

### Western blot analysis

Primary antibodies used for western blot analysis: rabbit anti-PR-Set7 (gift from Danny Reinberg) at 1:500, rabbit anti-H4K20me1 (Abcam) at 1:1000, rabbit anti-histone H3 (Abcam)

at 1:2000. Alexa Fluor 680 goat anti-rabbit IgG (Invitrogen) was used at 1:10000 as a secondary antibody. Immunoblots were scanned using a LiCor infrared system and analyzed with Odyssey software.

## **Flow cytometry and cell sorting**

For cell cycle analysis by flow cytometry, cells were harvested by centrifugation, washed in 1x cold PBS, resuspended in 500  $\mu$ l PBS and fixed with 5 ml ice-cold 100% ethanol at 4°C overnight. The cells were then washed in 1x cold PBS, resuspended in PBS with 0.3 mg/ml RNase A and 15  $\mu$ g/ml propidium iodide, and incubated for 30 minutes at room temperature. Flow cytometry was performed on BD FACscan analyzer machine and 30000 cells were recorded for each sample. Histograms of cell cycle distribution were generated with the R bioconductor flowCore package [53].

To sort cells into G<sub>1</sub>/S and late S/G<sub>2</sub> populations, asynchronous cells were fixed with 1% formaldehyde for 10 min and quenched by 125 mM glycine for 10 min. Then 0.5  $\mu$ g/ml Hoechst 33342 (Invitrogen) was used to stain DNA before the cells were sorted into G<sub>1</sub>/S and late S/G<sub>2</sub> populations based on DNA content using BD DiVa sorter.

## **Immunofluorescence**

For EdU pulse labeling, cells were incubated with 10  $\mu$ M EdU for 30 minutes before harvest, fixed with 4% paraformaldehyde in PBS for 10 minutes, permeabilized with 0.5% Triton X-100 in PBS for 3 minutes, and labeled with the Click-iT EdU imaging kit (Invitrogen). Cells were then blocked with 3% BSA in PBS with 0.1% Triton X-100 (PBS-T), stained with rabbit anti-H4K20me1 (Abcam) at a dilution of 1:1000. Alexa Fluor 568 goat anti-rabbit (Invitrogen)

was used at 1:500 as the secondary antibody. For detecting  $\gamma$ -H2A.v, cells were fixed, permeabilized, and blocked as above. Cells were stained with mouse monoclonal anti- $\gamma$ -H2A.v (DSHB UNC93-5.2.1-s) at 1:500 and Alexa Fluor 488 goat anti-mouse (Invitrogen) at 1:500. All slides were mounted with VECTASHIELD Mounting Medium with DAPI (Vector Laboratories) and observed with Zeiss Axio Imager widefield fluorescence microscope with 40x objective.

### **DNA comet assay**

The neutral DNA comet assay was performed using the CometAssay Kit (Trevigen). DNA was stained with the SYTOX Green nucleic acid stain (Invitrogen, dilute to 1:10000 in TE) and images were acquired with an Zeiss Axio Imager widefield fluorescence microscope. The comet tail moment was quantified using the the ImageJ plugin OpenComet [54].

### **Chromatin immunoprecipitation**

Chromatin immunoprecipitation were performed as previously described [55]. H4K20me1 and  $\gamma$ -H2A.v ChIP experiments were performed using rabbit anti-H4K20me1 (Abcam, validated for ChIP-seq [56]) and mouse anti- $\gamma$ -H2A.v (DSHB UNC93-5.2.1-s) antibodies, respectively. The  $\gamma$ -H2A.v ChIP experiment was performed in duplicate. The H4K20me1 experiment was also performed in duplicate by using two independent approaches (HU exposure and cell sorting) to obtain synchronous cell populations.

### **Genome-wide analysis of early origin activation**

A 10 ml culture of asynchronous cells at a concentration of  $1 \times 10^6$  cells/ml was treated with dsRNA or copper for 36 hours and then 1 mM HU was added and the cells were incubated for 4 hours to stall any active replication forks. Subsequently, 10  $\mu$ M BrdU was added to the culture

and the cells were incubated for another 16 hours before harvesting. Genomic DNA extraction and BrdU immunoprecipitation were performed as previously described [57].

## Sequencing library preparation

Illumina sequencing libraries were generated from the DNA enriched by ChIP or BrdU immunoprecipitation using Illumina's TruSeq protocols.

## Sequencing read alignment

Sequenced reads were aligned to the dm3 release 5.12 of the *Drosophila melanogaster* genome assembly (downloaded from the UCSC Genome Browser, and available at <ftp://hgdownload.cse.ucsc.edu/goldenPath/dm3/bigZips/chromFa.tar.gz>), using the software package Bowtie (version 0.12.7) [58]. The following Bowtie parameters were used: `-n 2 -l 30 -m 1 --best --strata -y`.

## Data accession and genomic data analysis

All genomic data are publicly available at the NCBI GEO data repository with the accession number GSE73668.

For H4K20me1 ChIP-seq and BrdU-seq experiments, RPKM (reads per kilobase, per million mappable reads) was calculated over bins of 10 kb stepping every 1 kb. For the  $\gamma$ -H2A.v datasets, RPKM was determined over nonoverlapping bins of 5 kb. The list of gene regions was downloaded from UCSC Table Browser (Assembly BDGP R5/dm3) using FlyBase Genes track.

The H4K20me1 ChIP signal was normalized between early and late S-phase samples based on the relative enrichment in the top 5% of detected peaks [59].

For  $\gamma$ -H2A.v ChIP-seq analysis, we calculated the log<sub>2</sub> difference of ChIP signal:  $\log_2 \text{difference} = \log_2(\text{PR-Set7 RNAi RPKM} + 1) - \log_2(\text{control RNAi RPKM} + 1)$ . A positive value indicates increased  $\gamma$ -H2A.v upon PR-Set7 RNAi treatment. To identify discrete  $\gamma$ -H2A.v domains, we trained a two-state hidden Markov model (HMM, representing positive or negative  $\gamma$ -H2A.v domains), with each state emitting a univariate normal distribution corresponding to the log<sub>2</sub> difference values. To generate the metaplot of replication timing over late replicating domains, each late domain was divided into 50 bins. Twenty-five flanking upstream and downstream bins, equivalent in width to the late domain bin, were also included. The  $\gamma$ -H2A.v log<sub>2</sub> differences and replication timing values within each bin were then calculated and the respective means across all domains were plotted to generate a metadomain.

## **Acknowledgements**

We thank members of the MacAlpine and Fox laboratories for suggestions and critical reading of the manuscript. We are grateful for bioinformatic advice and suggestions from Jeff Du and Jason A. Belsky. We thank Danny Reinberg for providing the rabbit PR-Set7 antibody. This work was supported by the American Cancer Society (RSG-11-048-01-DMC) and from the National Institutes of Health (GM104097).

## Figures

**Fig 1. H4K20me1 is necessary for cell cycle progression.** (A-B) PR-Set7 downregulation arrests cell cycle progression. Asynchronous cells were depleted for the histone methyltransferases, PR-Set7 or Suv4-20, by RNAi, or alternatively, a stabilized mutant of PR-Set7, PR-Set7<sup>PIPm</sup>, was overexpressed alone or in combination with Suv4-20 depletion for 72 hours. Cells were harvested for (A) western blot analysis for relative levels of PR-Set7 and H4K20me1 (histone H3 as the loading control), and for (B) cell cycle analysis by flow cytometry. (C-D) Kinetics of PR-Set7 RNAi induced cell cycle arrest. Dacapo was overexpressed for 24 hours with control or PR-Set7 dsRNA. The cells were then released from Dacapo overexpression and collected at 24 hours and 48 hours (C) western blot analysis of H4K20me1 (histone H3 as the loading control) and (D) flow cytometry analysis of the cell cycle profile.

**Fig 2. H4K20me1 levels are globally increased throughout the genome in late S phase.** (A) H4K20me1 is restricted to cells in late S phase and G2. Asynchronous cells were pulse labeled with EdU for 30 minutes to detect cells in early/mid and late S phase. EdU and H4K20me1 were detected by immunofluorescence microscopy and the nuclei were stained with DAPI. (B) Quantification of H4K20me1 immunofluorescence intensity in early and late S phase (n>20). (C) H4K20me1 is established in late S-phase cells released (6 hours) from an HU arrest. (D) Enrichment of H4K20me1 (RPKM) over a representative 4 MB region of chromosome 2L for cells arrested at the G1/S transition with HU (blue) or cells in late S phase following release from HU for 6 hours (orange). (E) H4K20me1 is enriched at transcription start sites and gene bodies. Aggregate plots of H4K20me1 enrichment in HU arrested (blue) and HU released (orange) cells relative to transcription start sites. (F) H4K20me1 levels increase in both genic

and intergenic regions during late S phase. Boxplots representing the distribution of H4K20me1 RPKM within 13428 genic and 11430 intergenic regions ( $p < 2.2 \times 10^{-16}$ ).

**Fig 3. PR-Set7 maintains genome integrity.** (A) Depletion of PR-Set7 by RNAi treatment for 72 hours leads to elevated  $\gamma$ -H2A.v staining (cyan). Nuclear DNA is stained with DAPI (magenta). (B) Depletion of PR-Set7 results in DNA double-strand breaks as determined by a neutral DNA comet assay. Treatment with 0.03% MMS serves as a positive control. (C) Quantification of tail moments (tail length  $\times$  percentage of DNA in tail) from the neutral DNA comet assay ( $n > 45$  for each condition). (D) Flow cytometry analysis of the cell cycle after RNAi treatment against control, PR-Set7, ATM/PR-Set7 and ATR/PR-Set7 for 72 hours..

**Fig 4. De-regulation of H4K20 methylation does not impact the activation of replication origins.** (A) Genome-wide early origin activity was mapped by BrdU-Seq for control and PR-Set7 depleted cells. Late origin activity was mapped by BrdU-Seq for cells depleted of ATR and ATR/PR-Set7. BrdU enrichment (RPKM) is depicted for a representative 2.5 MB window of chromosome 2L. (B) Heatmap depicting the pairwise Pearson correlations for origin activity across the different experimental conditions.

**Fig 5. Loss of PR-Set7 leads to the accumulation of DNA damage in late replicating regions of the *Drosophila* genome.** (A) The DNA damage marker,  $\gamma$ -H2A.v, accumulates in late replicating regions of the genome. The genome-wide distribution of  $\gamma$ -H2A.v was determined for control and PR-Set7 depleted cells by ChIP-Seq (Fig S5). The log<sub>2</sub> difference in  $\gamma$ -H2A.v enrichment between PR-Set7 and control RNAi treated cells (blue) is depicted for a 5 Mb window of chromosome 2L. A replication timing profile (red) for chromosome 2L [31] is overlaid on the plot. (B)  $\gamma$ -H2A.v is inversely correlated with the time of replication in S-phase.

Each data point represents a 5 kb bin and the Pearson correlation between replication timing and the log<sub>2</sub> difference in  $\gamma$ -H2A.v between PR-Set7 depleted and control cells was calculated. (C)  $\gamma$ -H2A.v is enriched throughout late replicating domains. Meta-domain analysis of  $\gamma$ -H2A.v enrichment in PR-Set7 depleted cells relative to control cells (blue) and replication timing values (orange) over late replicating domains. Each late replicating domain was divided into 50 bins and the average  $\gamma$ -H2A.v log<sub>2</sub> difference between PR-Set7 depleted and control cells as well as replication timing values were plotted.

**Fig 6. Model for the maintenance of *Drosophila* genome integrity by PR-Set7 in late replicating domains.** The majority of parental histone H4 (orange) exists in the dimethylated state in G1. *Left branch (wild type)*: PR-Set7 is absent in early S phase and nucleosomes containing nascent histone H4 unmethylated at H4K20 accumulate on newly synthesized DNA. PR-Set7 levels and activity are restored in late S phase and there is a global conversion of nascent nucleosomes from H4K20me0 to H4K20me1. Following S phase the monomethylated H4K20 is converted to H4K20me2. *Right branch (absence of PR-Set7)*: In the absence of PR-Set7, the first S phase is completed and unmethylated nascent histone H4 (H4K20me0) is accumulated throughout the genome. In the subsequent S phase, early replicating domains are able to be copied; however, during late S phase there is an accumulation of DNA damage, activation of an ATR-dependent intra-S phase dependent checkpoint and cell cycle arrest. Presumably the presence of H4K20me0 in late replicating but not early replicating domains leads to replication fork stalling and collapse suggesting a critical role for PR-Set7 in maintaining the integrity of late replicating domains.

**Fig S1. PR-Set7 depletion is sufficient to prevent the accumulation of H4K20me1 upon release from a Dacapo-induced G1 cell cycle arrest.** (A) Control and PR-Set7



depleted cells enter late S/G2 within 8 hours following release from a Dacapo-induced G1 arrest. (B) RNAi-mediated depletion of PR-Set7 is sufficient to block the monomethylation of H4K20 in late S/G2 following release from the Dacapo induced cell cycle arrest. Immunofluorescence of H4K20me1 (red) in control and PR-Set7 depleted cells 8 hours following release into S phase. DNA is stained with DAPI (blue). (C) Boxplots resulting from the quantification of H4K20me1 intensity for each condition (n>180).

**Fig S2. H4K20me1 levels are globally increased throughout the genome in late S phase.** (A) Cell sorting. Hoechst 33342 stained cells were sorted into G1/S and late S/G2 populations based on DNA content. (B) Enrichment of H4K20me1 (RPKM) over a representative 4 MB region of chromosome 2L for cells enriched in G1/early S (blue) or late S/G2 (orange) of the cell cycle by cell sorting. (C) H4K20me1 is enriched at transcription start sites and gene bodies. Aggregate plots of H4K20me1 enrichment in G1/early S (blue) and late S/G2 (orange) cells relative to transcription start sites. (D) H4K20me1 levels increase in both genic and intergenic regions during late S phase. Boxplots representing the distribution of H4K20me1 RPKM within 13428 genic and 11430 intergenic regions ( $p < 2.2 \times 10^{-16}$ ).

**Fig S3. PR-Set7 depletion leads to increased H2A.v phosphorylation independent of ATM.** (A-B) Quantification of  $\gamma$ -H2A.v signal upon PR-Set7 RNAi treatment. (A) Average number of  $\gamma$ -H2A.v foci per cell from three independent experiments ( $p = 0.039$ , t-test). Each error bar is two SDs. (B) Boxplot of the immunofluorescence intensity of  $\gamma$ -H2A.v per cell from one representative experiment. (C) Verification of ATM downregulation by ATM dsRNA treatment. The cells were incubated with control, ATR, or ATM dsRNA for 48 hours before 0.05% MMS was added and incubated for 2 hours (labeled as “MMS +”). The intensity of H2A.v

phosphorylation ( $\gamma$ -H2A.v) in response to MMS treatment was measured by immunofluorescence microscopy and depicted with boxplots ( $n > 250$ ).

**Fig S4. BrdU incorporation in HU arrested cells is enriched at ORC binding sites.**

Heatmap of BrdU incorporation (measured as RPKM) in relation to 5159 ORC binding sites [29]. Below the dashed line are the 1677 ORC sites at early origins and above the dashed line are ORC sites at late origins. The center of ORC peak is labeled as position o.

**Fig S5. Genome-wide distribution of  $\gamma$ -H2A.v for control and PR-Set7 depleted**

**cells.** ChIP-seq analysis of the genome-wide distribution of  $\gamma$ -H2A.v for control and PR-Set7 depleted cells (RPKM).

**Fig S6. Disruption of the homologous recombination (HR) pathway does not**

**reduce DNA damage resulting from loss of PR-Set7.** Cells were treated with control or PR-Set7 RNAi for 72 hours before harvest and immunofluorescence staining of  $\gamma$ -H2A.v. The immunofluorescence intensity of  $\gamma$ -H2A.v under each condition was depicted with boxplots ( $n > 250$ ).

**Table S1. List of the chromosomal positions of late replicating domains and  $\gamma$ -H2A.v domains identified by a hidden Markov model.**

**Table S2. List of primer sequences used for generating dsRNAs.**

## References

1. Beck DB, Oda H, Shen SS, Reinberg D. PR-Set7 and H4K20me1: at the crossroads of genome integrity, cell cycle, chromosome condensation, and transcription. *Genes Dev.* 2012;26: 325–337.
2. Brustel J, Tardat M, Kirsh O, Grimaud C, Julien E. Coupling mitosis to DNA replication: the emerging role of the histone H4-lysine 20 methyltransferase PR-Set7. *Trends Cell Biol.* 2011;21: 452–460.
3. Jorgensen S, Schotta G, Sorensen CS. Histone H4 lysine 20 methylation: key player in epigenetic regulation of genomic integrity. *Nucleic Acids Res.* 2013;41: 2797–2806.
4. Nishioka K, Rice JC, Sarma K, Erdjument-Bromage H, Werner J, Wang Y, et al. PR-Set7 is a nucleosome-specific methyltransferase that modifies lysine 20 of histone H4 and is associated with silent chromatin. *Mol Cell.* 2002;9: 1201–1213.
5. Fang J, Feng Q, Ketel CS, Wang H, Cao R, Xia L, et al. Purification and functional characterization of SET8, a nucleosomal histone H4-lysine 20-specific methyltransferase. *Curr Biol.* 2002;12: 1086–1099.
6. Schotta G, Sengupta R, Kubicek S, Malin S, Kauer M, Callen E, et al. A chromatin-wide transition to H4K20 monomethylation impairs genome integrity and programmed DNA rearrangements in the mouse. *Genes Dev.* 2008;22: 2048–2061.
7. Yang H, Pesavento JJ, Starnes TW, Cryderman DE, Wallrath LL, Kelleher NL, et al. Preferential dimethylation of histone H4 lysine 20 by Suv4-20. *J Biol Chem.* 2008;283: 12085–12092.
8. Abbas T, Shibata E, Park J, Jha S, Karnani N, Dutta A. CRL4(Cdt2) regulates cell proliferation and histone gene expression by targeting PR-Set7/Set8 for degradation. *Mol Cell.* 2010;40: 9–21.
9. Centore RC, Havens CG, Manning AL, Li JM, Flynn RL, Tse A, et al. CRL4(Cdt2)-mediated destruction of the histone methyltransferase Set8 prevents premature chromatin compaction in S phase. *Mol Cell.* 2010;40: 22–33.
10. Oda H, Hubner MR, Beck DB, Vermeulen M, Hurwitz J, Spector DL, et al. Regulation of the histone H4 monomethylase PR-Set7 by CRL4(Cdt2)-mediated PCNA-dependent degradation during DNA damage. *Mol Cell.* 2010;40: 364–376.
11. Tardat M, Brustel J, Kirsh O, Lefevbre C, Callanan M, Sardet C, et al. The histone H4 Lys 20 methyltransferase PR-Set7 regulates replication origins in mammalian cells. *Nat Cell Biol.* 2010;12: 1086–1093.
12. Jorgensen S, Eskildsen M, Fugger K, Hansen L, Larsen MS, Kousholt AN, et al. SET8 is degraded via PCNA-coupled CRL4(CDT2) ubiquitylation in S phase and after UV irradiation. *J Cell Biol.* 2011;192: 43–54.

13. Sahashi R, Crevel G, Pasko J, Suyari O, Nagai R, Saura MM, et al. DNA polymerase alpha interacts with PrSet7 and mediates H4K20 monomethylation in *Drosophila*. *J Cell Sci*. 2014;127: 3066–3078.
14. Jorgensen S, Elvers I, Trelle MB, Menzel T, Eskildsen M, Jensen ON, et al. The histone methyltransferase SET8 is required for S-phase progression. *J Cell Biol*. 2007;179: 1337–1345.
15. Tardat M, Murr R, Herceg Z, Sardet C, Julien E. PR-Set7-dependent lysine methylation ensures genome replication and stability through S phase. *J Cell Biol*. 2007;179: 1413–1426.
16. Houston SI, McManus KJ, Adams MM, Sims JK, Carpenter PB, Hendzel MJ, et al. Catalytic function of the PR-Set7 histone H4 lysine 20 monomethyltransferase is essential for mitotic entry and genomic stability. *J Biol Chem*. 2008;283: 19478–19488.
17. Sakaguchi A, Steward R. Aberrant monomethylation of histone H4 lysine 20 activates the DNA damage checkpoint in *Drosophila melanogaster*. *J Cell Biol*. 2007;176: 155–162.
18. Sakaguchi A, Joyce E, Aoki T, Schedl P, Steward R. The histone H4 lysine 20 monomethyl mark, set by PR-Set7 and stabilized by L(3)mbt, is necessary for proper interphase chromatin organization. *PLoS One*. 2012;7: e45321.
19. Beck DB, Burton A, Oda H, Ziegler-Birling C, Torres-Padilla ME, Reinberg D. The role of PR-Set7 in replication licensing depends on Suv4-20h. *Genes Dev*. 2012;26: 2580–2589.
20. Kuo AJ, Song J, Cheung P, Ishibe-Murakami S, Yamazoe S, Chen JK, et al. The BAH domain of ORC1 links H4K20me2 to DNA replication licensing and Meier-Gorlin syndrome. *Nature*. 2012;484: 115–119.
21. Vermeulen M, Eberl HC, Matarese F, Marks H, Denissov S, Butter F, et al. Quantitative interaction proteomics and genome-wide profiling of epigenetic histone marks and their readers. *Cell*. 2010;142: 967–980.
22. Kourmouli N, Jeppesen P, Mahadevhaiah S, Burgoyne P, Wu R, Gilbert DM, et al. Heterochromatin and tri-methylated lysine 20 of histone H4 in animals. *J Cell Sci*. 2004;117: 2491–2501.
23. Schotta G, Lachner M, Sarma K, Ebert A, Sengupta R, Reuter G, et al. A silencing pathway to induce H3-K9 and H4-K20 trimethylation at constitutive heterochromatin. *Genes Dev*. 2004;18: 1251–1262.
24. Creager RL, Li Y, MacAlpine DM. SnapShot: Origins of DNA Replication. *Cell*. 2015;161: 418–418 e1.
25. Lane ME, Sauer K, Wallace K, Jan YN, Lehner CF, Vaessin H. Dacapo, a cyclin-dependent kinase inhibitor, stops cell proliferation during *Drosophila* development. *Cell*. 1996;87: 1225–1235.
26. Ding Q, MacAlpine DM. Preferential re-replication of *Drosophila* heterochromatin in the absence of geminin. *PLoS Genet*. 2010;6: e1001112.
27. Ho JWK, Jung YL, Liu T, Alver BH, Lee S, Ikegami K, et al. Comparative analysis of

- metazoan chromatin organization. *Nature*. 2014;512: 449–452.
28. Lake CM, Holsclaw JK, Bellendir SP, Sekelsky J, Hawley RS. The development of a monoclonal antibody recognizing the *Drosophila melanogaster* phosphorylated histone H2A variant (gamma-H2AV). *G3*. 2013;3: 1539–1543.
  29. Eaton ML, Prinz JA, MacAlpine HK, Tretyakov G, Kharchenko PV, MacAlpine DM. Chromatin signatures of the *Drosophila* replication program. *Genome Res*. 2011;21: 164–174.
  30. Seo J, Kim SC, Lee HS, Kim JK, Shon HJ, Salleh NLM, et al. Genome-wide profiles of H2AX and gamma-H2AX differentiate endogenous and exogenous DNA damage hotspots in human cells. *Nucleic Acids Res*. 2012;40: 5965–5974.
  31. Lubelsky Y, Prinz JA, DeNapoli L, Li Y, Belsky JA, MacAlpine DM. DNA replication and transcription programs respond to the same chromatin cues. *Genome Res*. 2014;24: 1102–1114.
  32. Letessier A, Millot GA, Koundrioukoff S, Lachages AM, Vogt N, Hansen RS, et al. Cell-type-specific replication initiation programs set fragility of the FRA3B fragile site. *Nature*. 2011;470: 120–123.
  33. Ozeri-Galai E, Lebofsky R, Rahat A, Bester AC, Bensimon A, Kerem B. Failure of Origin Activation in Response to Fork Stalling Leads to Chromosomal Instability at Fragile Sites. *Mol Cell*. 2011;43: 122–131.
  34. Stamatoyannopoulos JA, Adzhubei I, Thurman RE, Kryukov GV, Mirkin SM, Sunyaev SR. Human mutation rate associated with DNA replication timing. *Nat Genet*. 2009;41: 393–395.
  35. Silva E, Tiong S, Pedersen M, Homola E, Royou A, Fasulo B, et al. ATM is required for telomere maintenance and chromosome stability during *Drosophila* development. *Curr Biol*. 2004;14: 1341–1347.
  36. Song Y-H, Mirey G, Betson M, Haber DA, Settleman J. The *Drosophila* ATM ortholog, dATM, mediates the response to ionizing radiation and to spontaneous DNA damage during development. *Curr Biol*. 2004;14: 1354–1359.
  37. Gaillard H, Garcia-Muse T, Aguilera A. Replication stress and cancer. *Nat Rev Cancer*. 2015;15: 276–289.
  38. Filion GJ, van Bommel JG, Braunschweig U, Talhout W, Kind J, Ward LD, et al. Systematic protein location mapping reveals five principal chromatin types in *Drosophila* cells. *Cell*. 2010;143: 212–224.
  39. Oda H, Okamoto I, Murphy N, Chu J, Price SM, Shen MM, et al. Monomethylation of histone H4-lysine 20 is involved in chromosome structure and stability and is essential for mouse development. *Mol Cell Biol*. 2009;29: 2278–2295.
  40. Branzei D, Foiani M. Maintaining genome stability at the replication fork. *Nat Rev Mol Cell Biol*. 2010;11: 208–219.
  41. Botuyan MV, Lee J, Ward IM, Kim JE, Thompson JR, Chen J, et al. Structural basis for the

- methylation state-specific recognition of histone H4-K20 by 53BP1 and Crb2 in DNA repair. *Cell*. 2006;127: 1361–1373.
42. Panier S, Boulton SJ. Double-strand break repair: 53BP1 comes into focus. *Nat Rev Mol Cell Biol*. 2014;15: 7–18.
  43. Dulev S, Tkach J, Lin S, Batada NN. SET8 methyltransferase activity during the DNA double-strand break response is required for recruitment of 53BP1. *EMBO Rep*. 2014;15: 1163–1174.
  44. Congdon LM, Sims JK, Tuzon CT, Rice JC. The PR-Set7 binding domain of Riz1 is required for the H4K20me1-H3K9me1 trans-tail “histone code” and Riz1 tumor suppressor function. *Nucleic Acids Res*. 2014;42: 3580–3589.
  45. Sakaguchi A, Karachentsev D, Seth-Pasricha M, Druzhinina M, Steward R. Functional characterization of the drosophila Hmt4-20/Suv4-20 histone methyltransferase. *Genetics*. 2008;179: 317–322.
  46. Karachentsev D, Sarma K, Reinberg D, Steward R. PR-Set7-dependent methylation of histone H4 Lys 20 functions in repression of gene expression and is essential for mitosis. *Genes Dev*. 2005;19: 431–435.
  47. Shi X, Kachirskaja I, Yamaguchi H, West LE, Wen H, Wang EW, et al. Modulation of p53 function by SET8-mediated methylation at lysine 382. *Mol Cell*. 2007;27: 636–646.
  48. Takawa M, Cho HS, Hayami S, Toyokawa G, Kogure M, Yamane Y, et al. Histone lysine methyltransferase SETD8 promotes carcinogenesis by deregulating PCNA expression. *Cancer Res*. 2012;72: 3217–3227.
  49. McKay DJ, Klusza S, Penke TJR, Meers MP, Curry KP, McDaniel SL, et al. Interrogating the Function of Metazoan Histones using Engineered Gene Clusters. *Dev Cell*. 2015;32: 373–386.
  50. Fox DT, Duronio RJ. Endoreplication and polyploidy: insights into development and disease. *Development*. 2013;140: 3–12.
  51. Sher N, Bell GW, Li S, Nordman J, Eng T, Eaton ML, et al. Developmental control of gene copy number by repression of replication initiation and fork progression. *Genome Res*. 2012;22: 64–75.
  52. Mehrotra S, Maqbool SB, Kolpakas A, Murnen K, Calvi BR. Endocycling cells do not apoptose in response to DNA rereplication genotoxic stress. *Genes Dev*. 2008;22: 3158–3171.
  53. Hahne F, LeMeur N, Brinkman RR, Ellis B, Haaland P, Sarkar D, et al. flowCore: a Bioconductor package for high throughput flow cytometry. *BMC Bioinformatics*. 2009;10.
  54. Gyori BM, Venkatachalam G, Thiagarajan PS, Hsu D, Clement MV. Open Comet: An automated tool for comet assay image analysis. *Redox Biology*. 2014;2: 457–465.
  55. MacAlpine HK, Gordan R, Powell SK, Hartemink AJ, MacAlpine DM. Drosophila ORC localizes to open chromatin and marks sites of cohesin complex loading. *Genome Res*.

2010;20: 201–211.

56. Egelhofer TA, Minoda A, Klugman S, Lee K, Kolasinska-Zwierz P, Alekseyenko AA, et al. An assessment of histone-modification antibody quality. *Nat Struct Mol Biol.* 2011;18: 91–93.
57. Ryba T, Battaglia D, Pope BD, Hiratani I, Gilbert DM. Genome-scale analysis of replication timing: from bench to bioinformatics. *Nat Protoc.* 2011;6: 870–895.
58. Langmead B, Trapnell C, Pop M, Salzberg SL. Ultrafast and memory-efficient alignment of short DNA sequences to the human genome. *Genome Biol.* 2009;10: R25.
59. Sheu YJ, Kinney JB, Lengronne A, Pasero P, Stillman B. Domain within the helicase subunit Mcm4 integrates multiple kinase signals to control DNA replication initiation and fork progression. *Proc Natl Acad Sci U S A.* 2014;111: E1899–E1908.

**A**

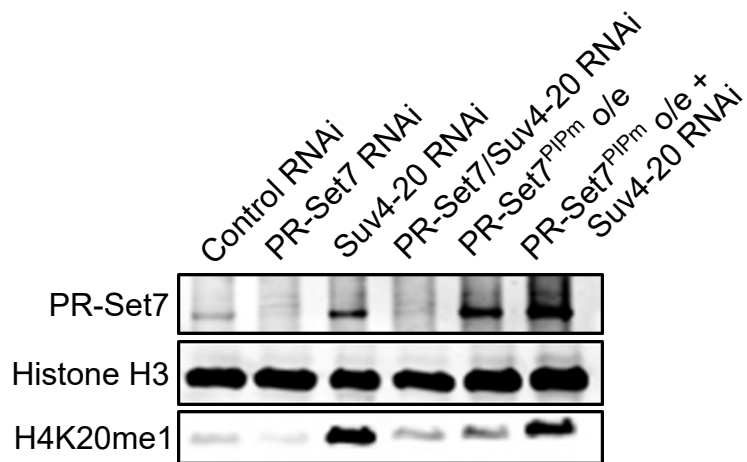

**B**

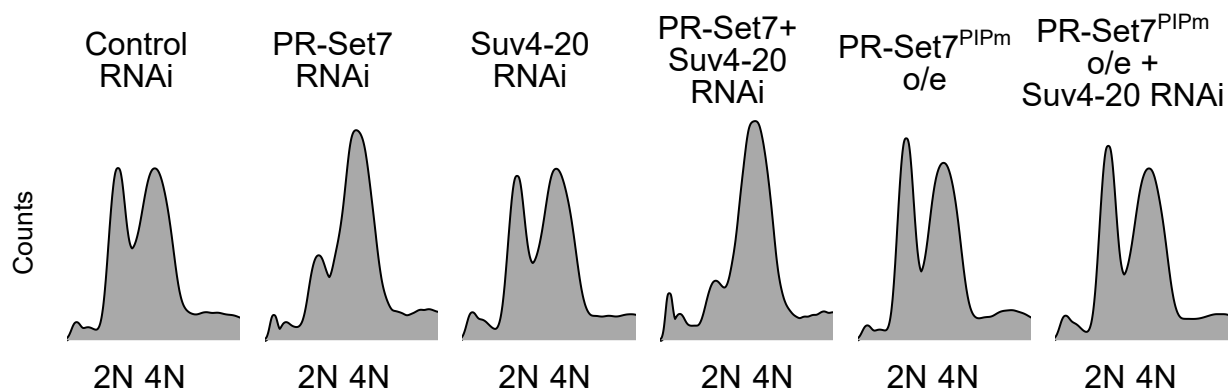

**C**

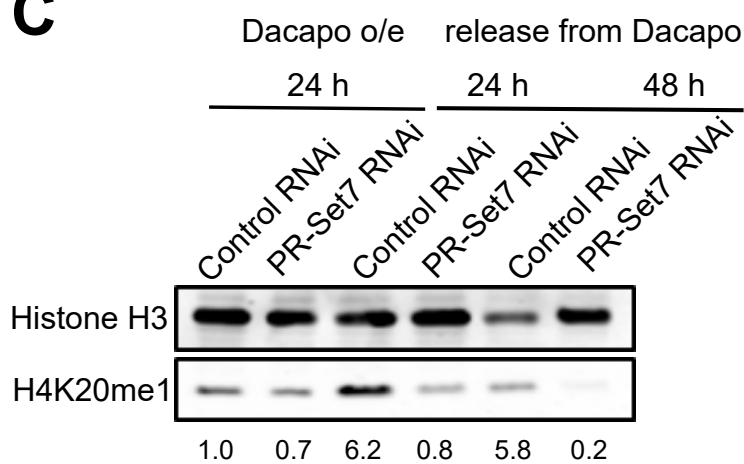

**D**

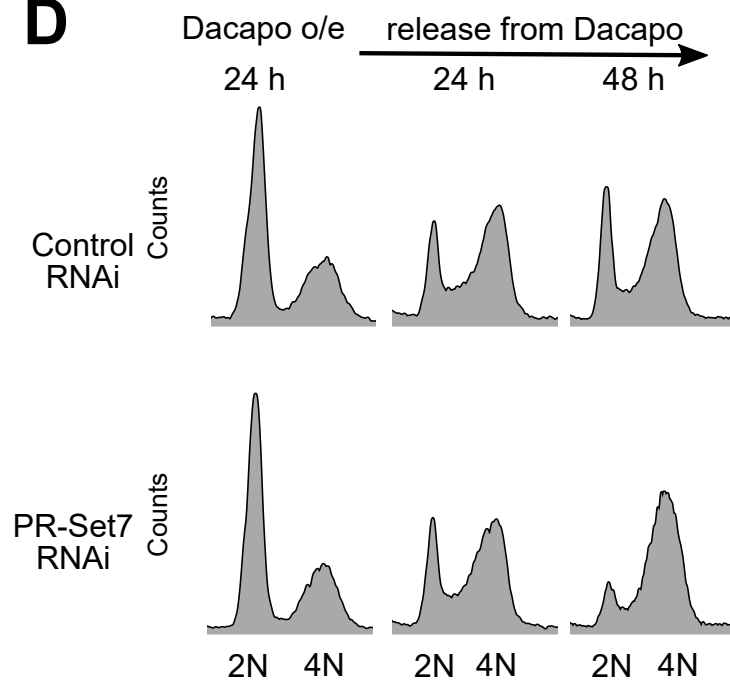



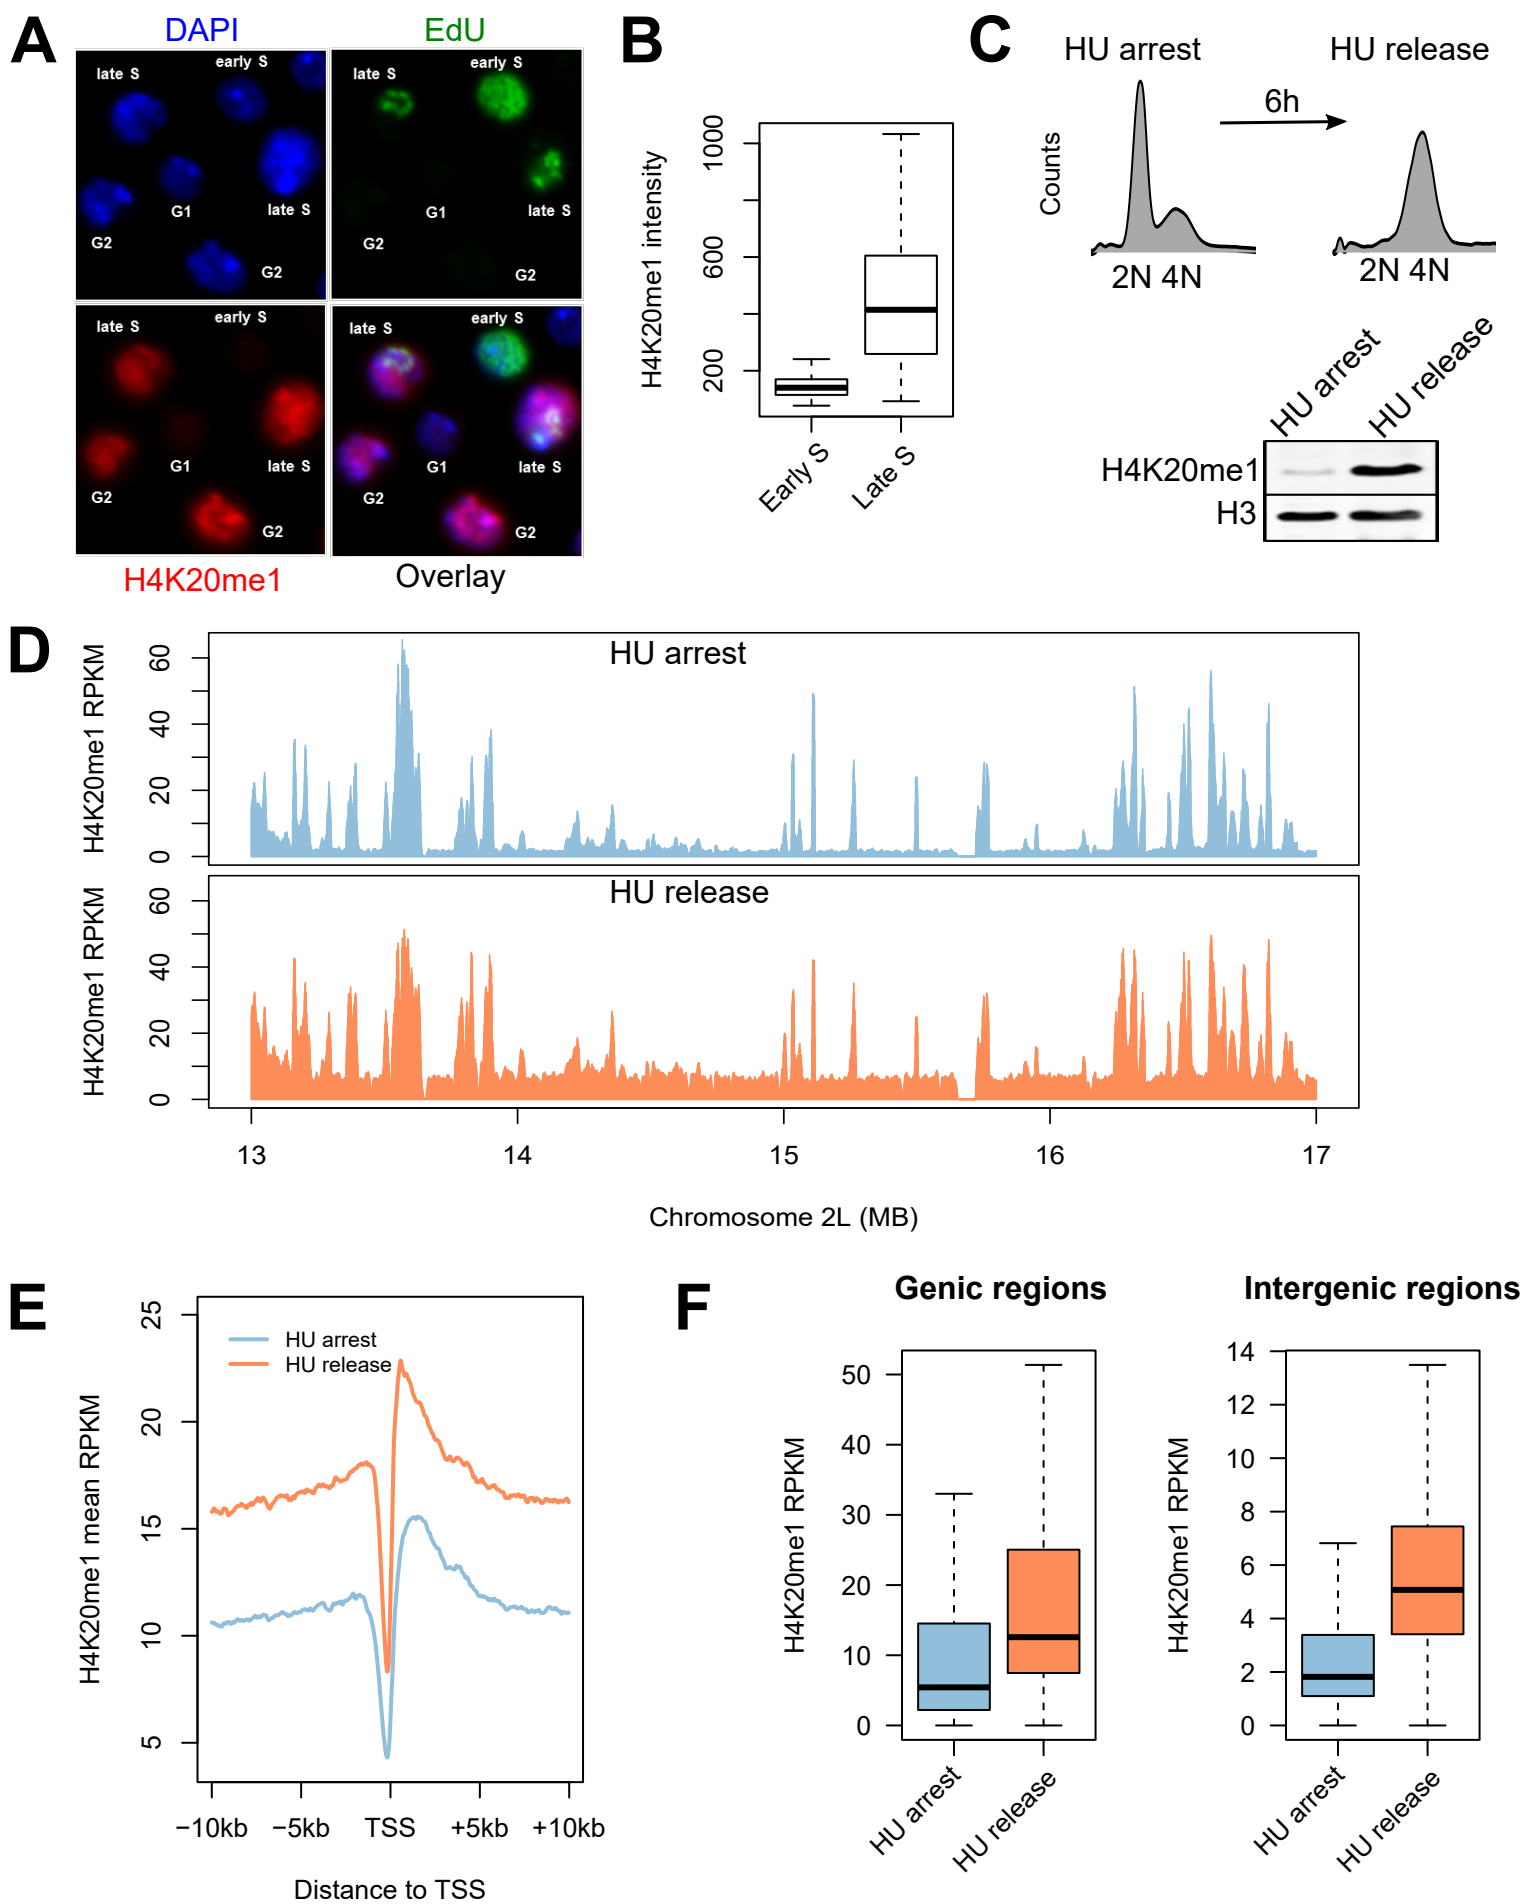

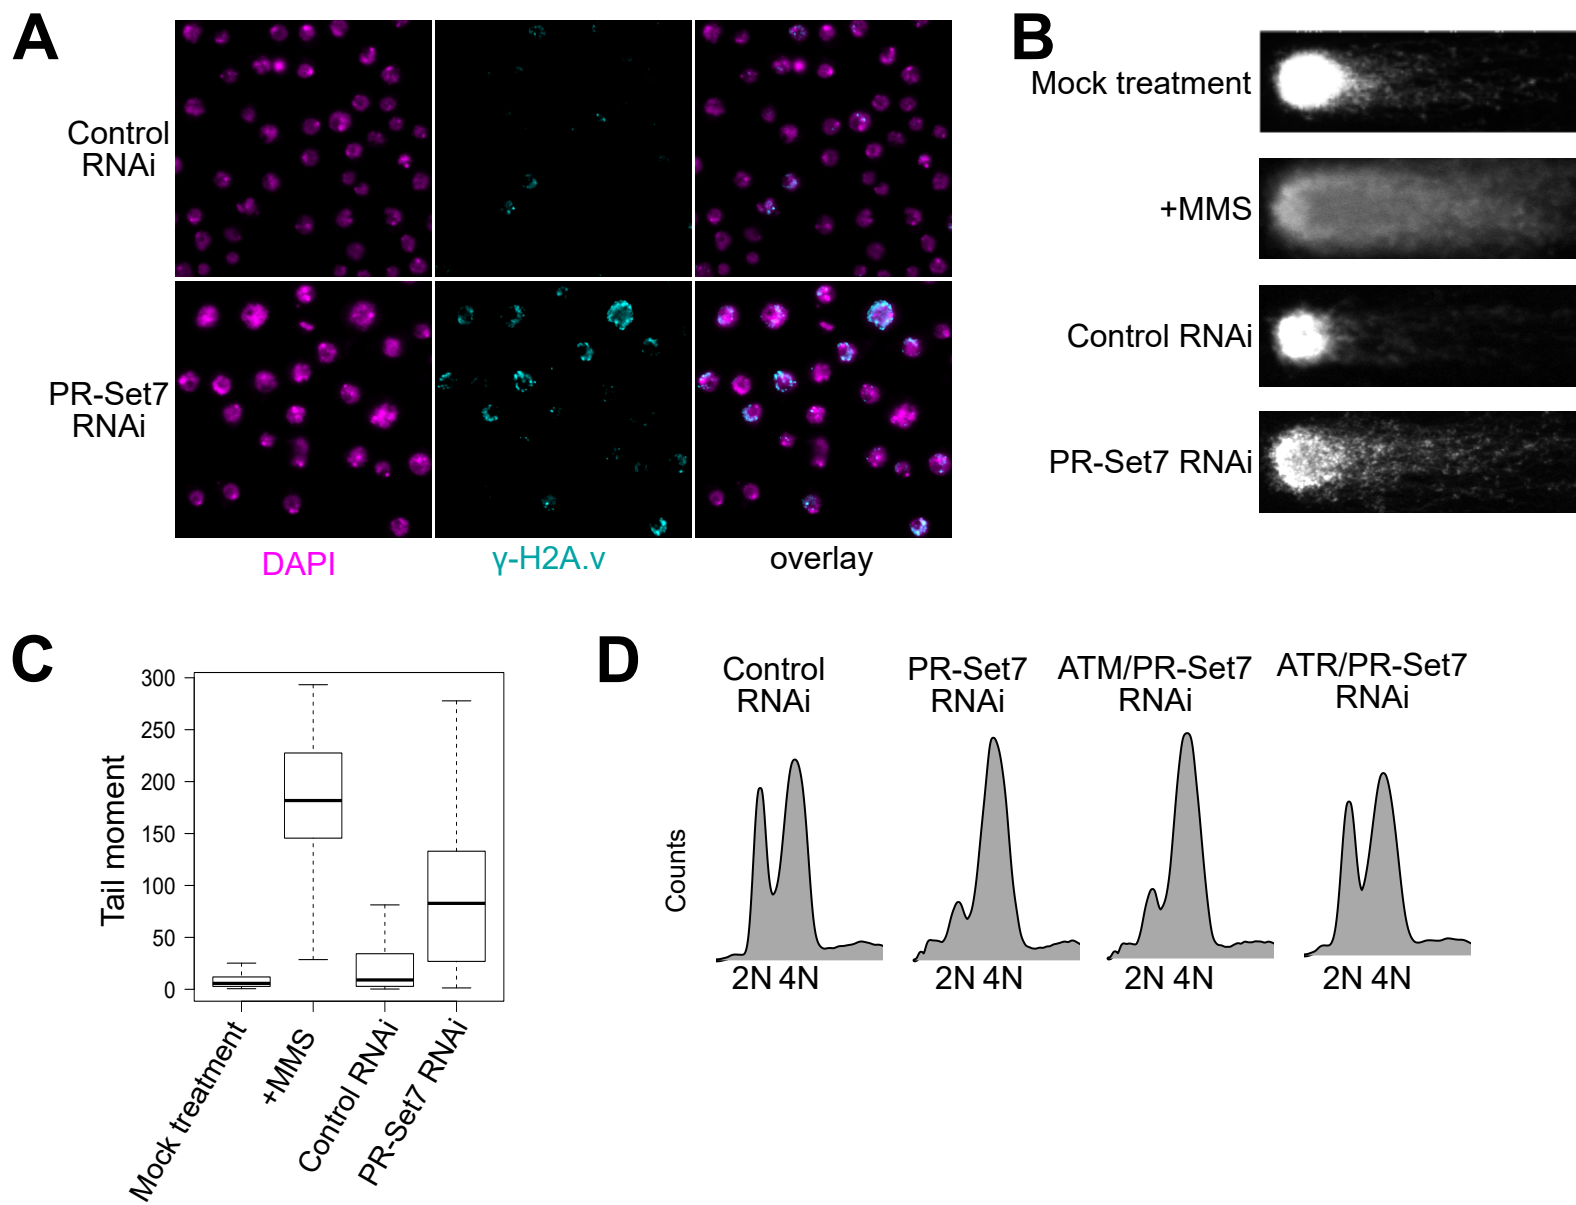

**A**

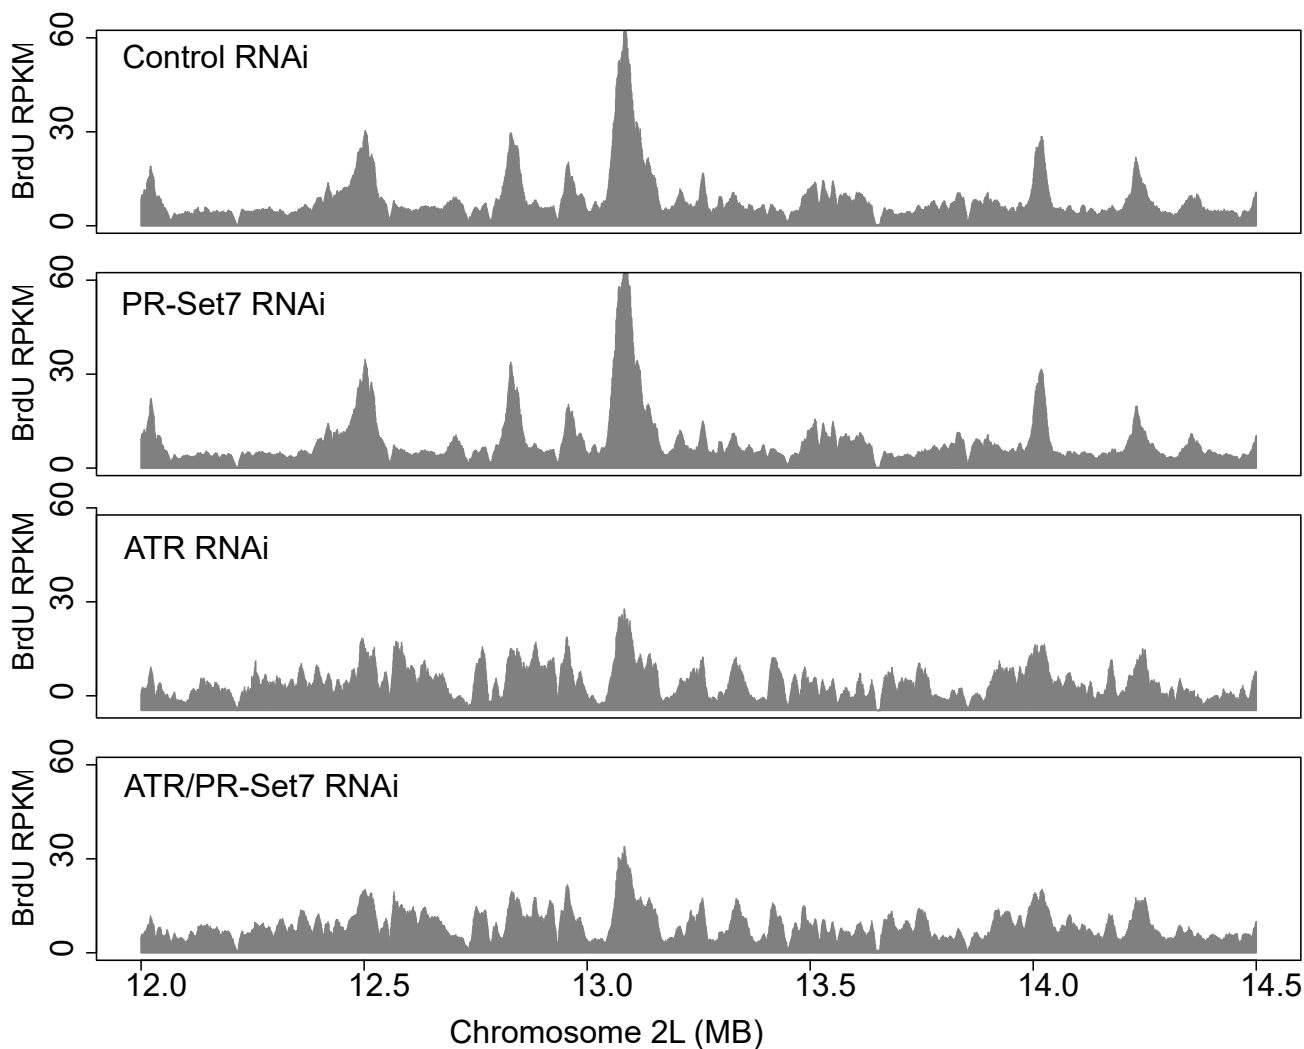

**B**

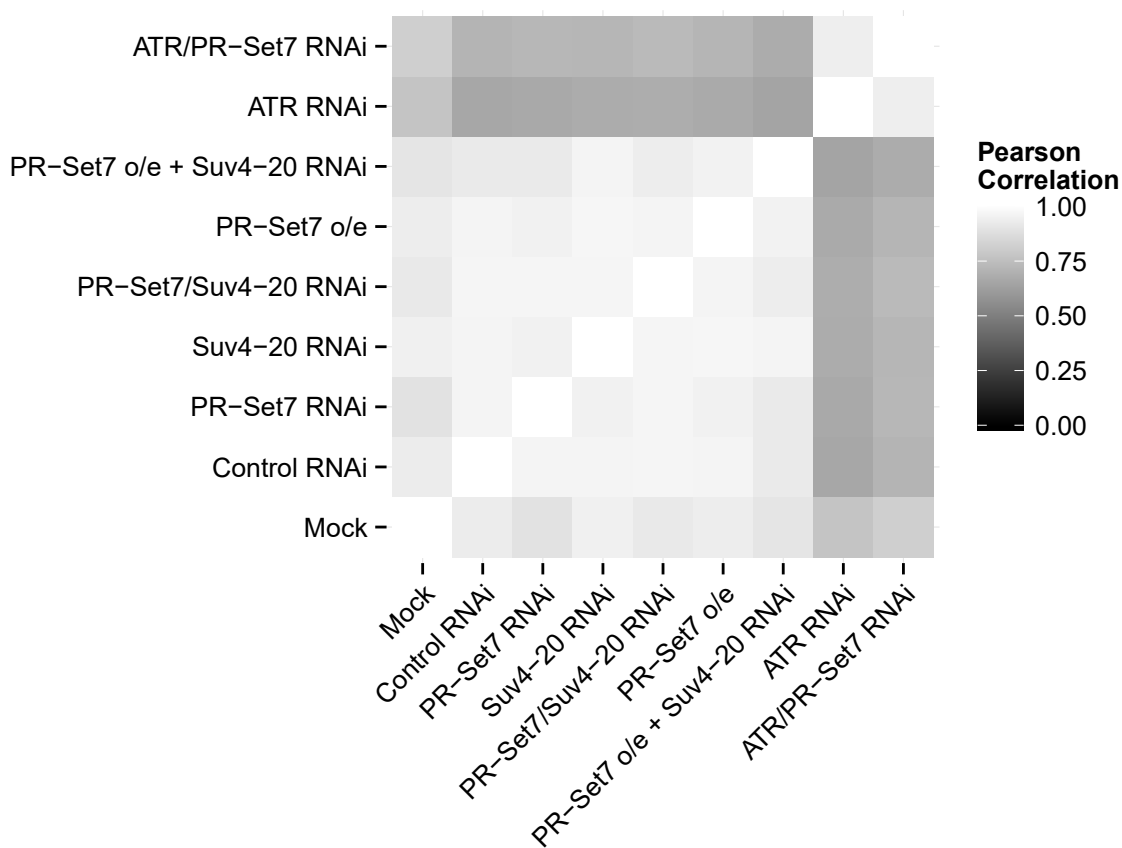

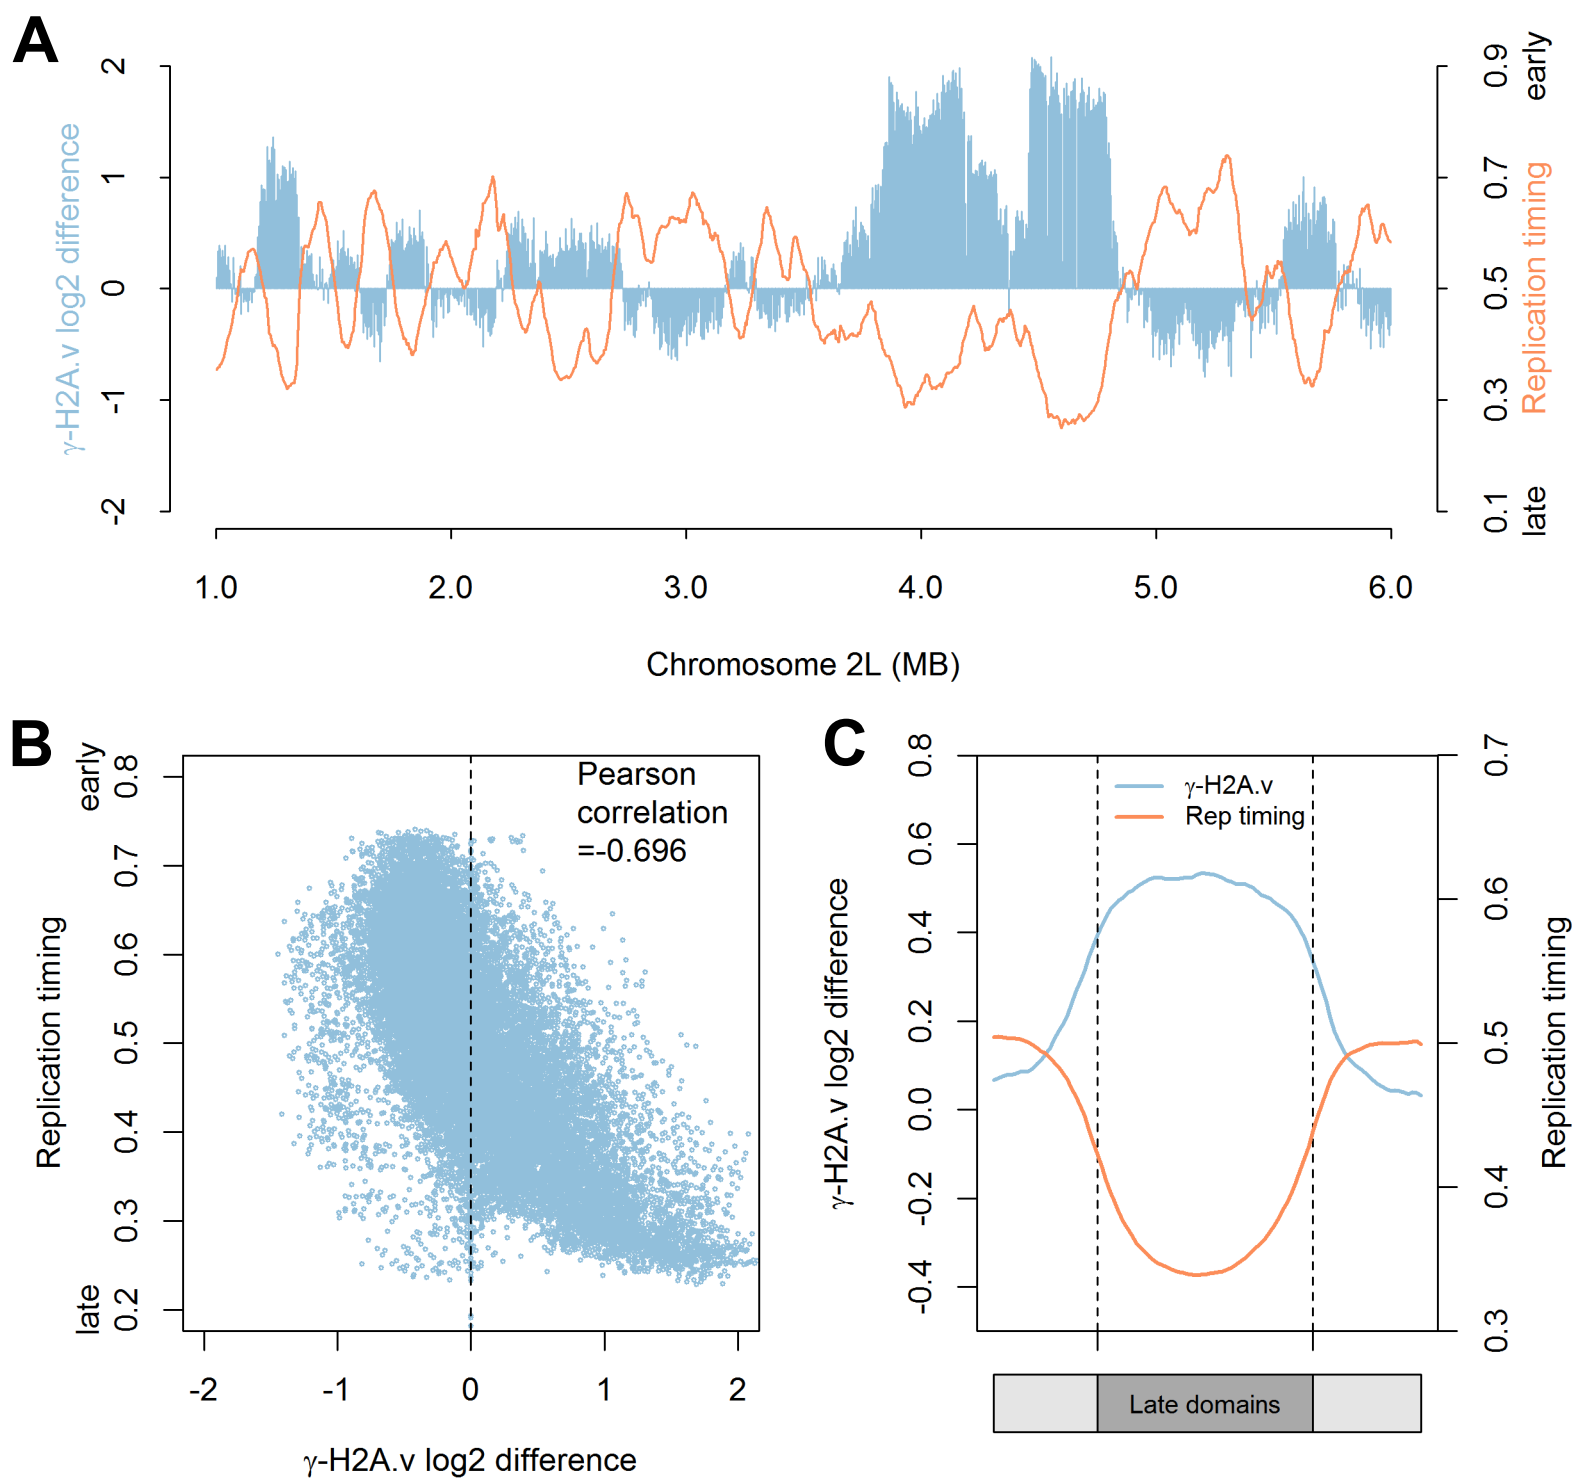

G1

1<sup>st</sup> G1

Control RNAi

PR-Set7 RNAi

Early S

1<sup>st</sup> S

Late S

2<sup>nd</sup> G12<sup>nd</sup> early S2<sup>nd</sup> late S

PR-Set7

- ATR checkpoint activation
- DNA damage
- Cell cycle arrest

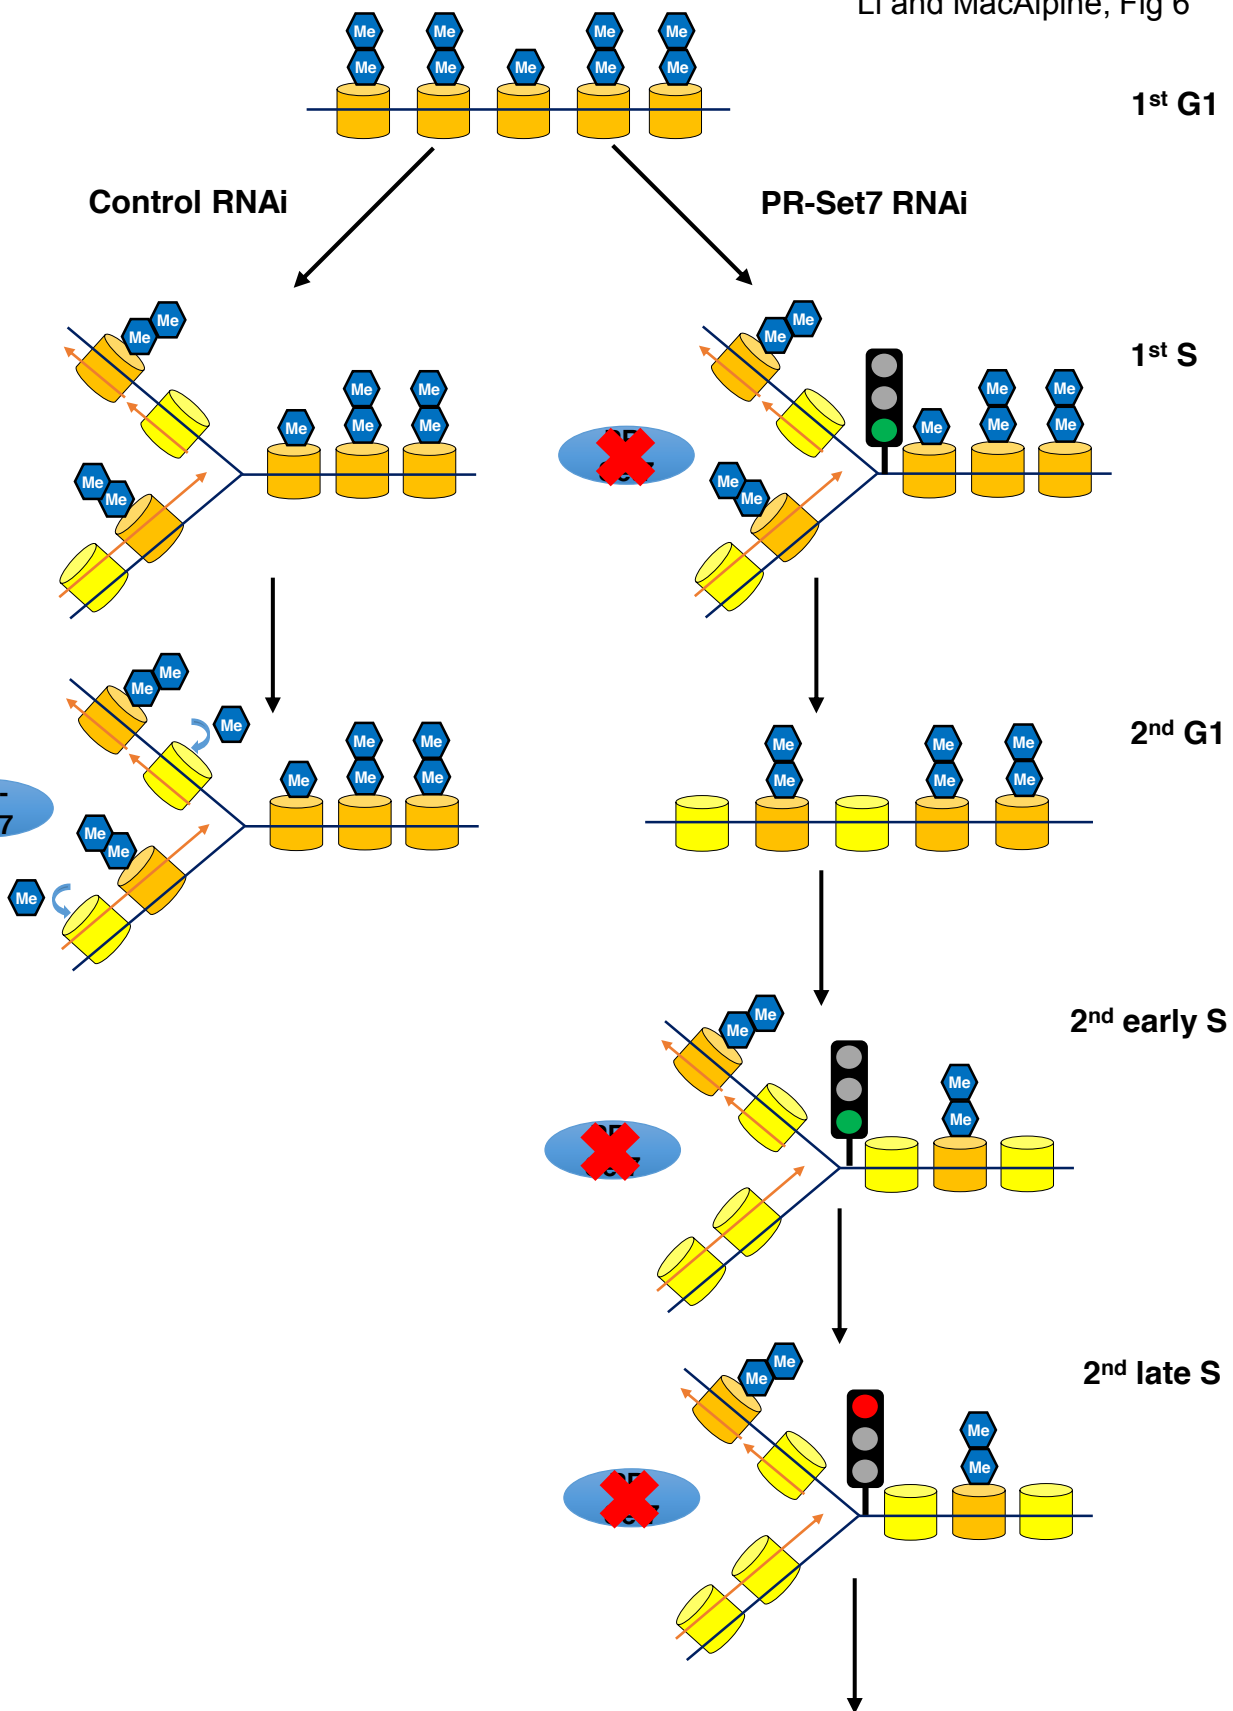

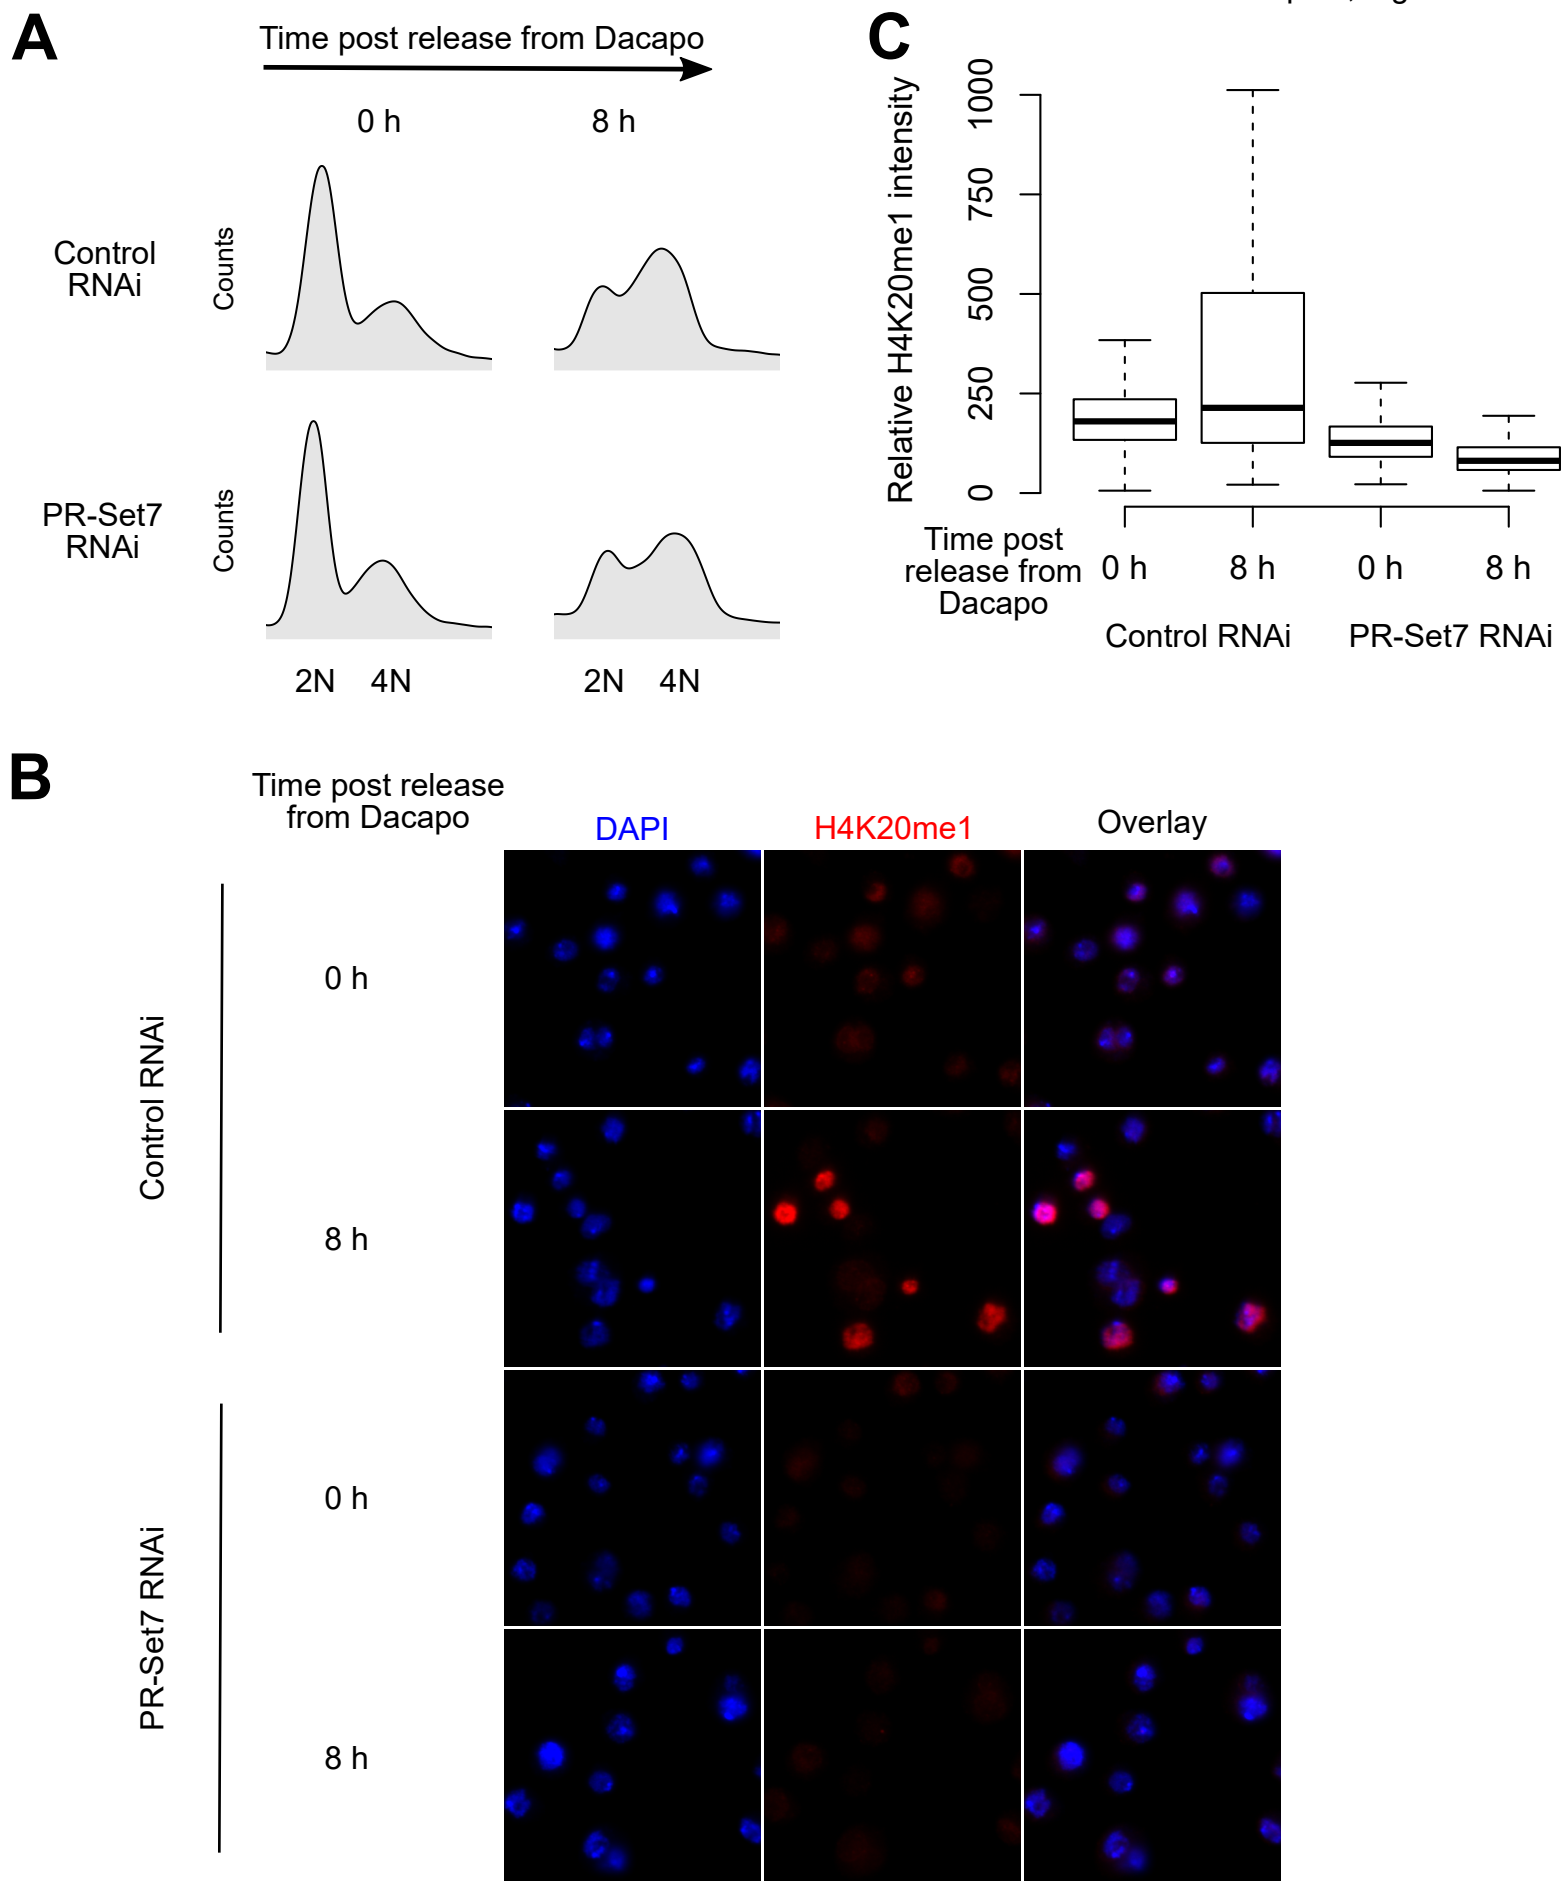

**A**

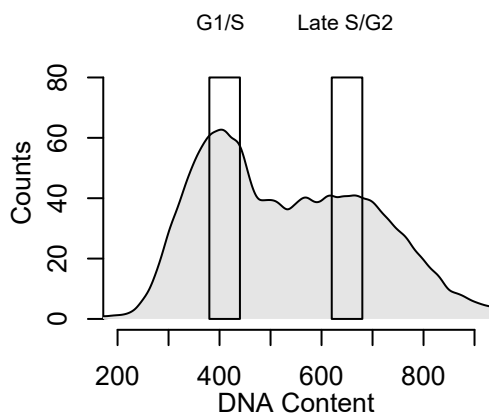

**B**

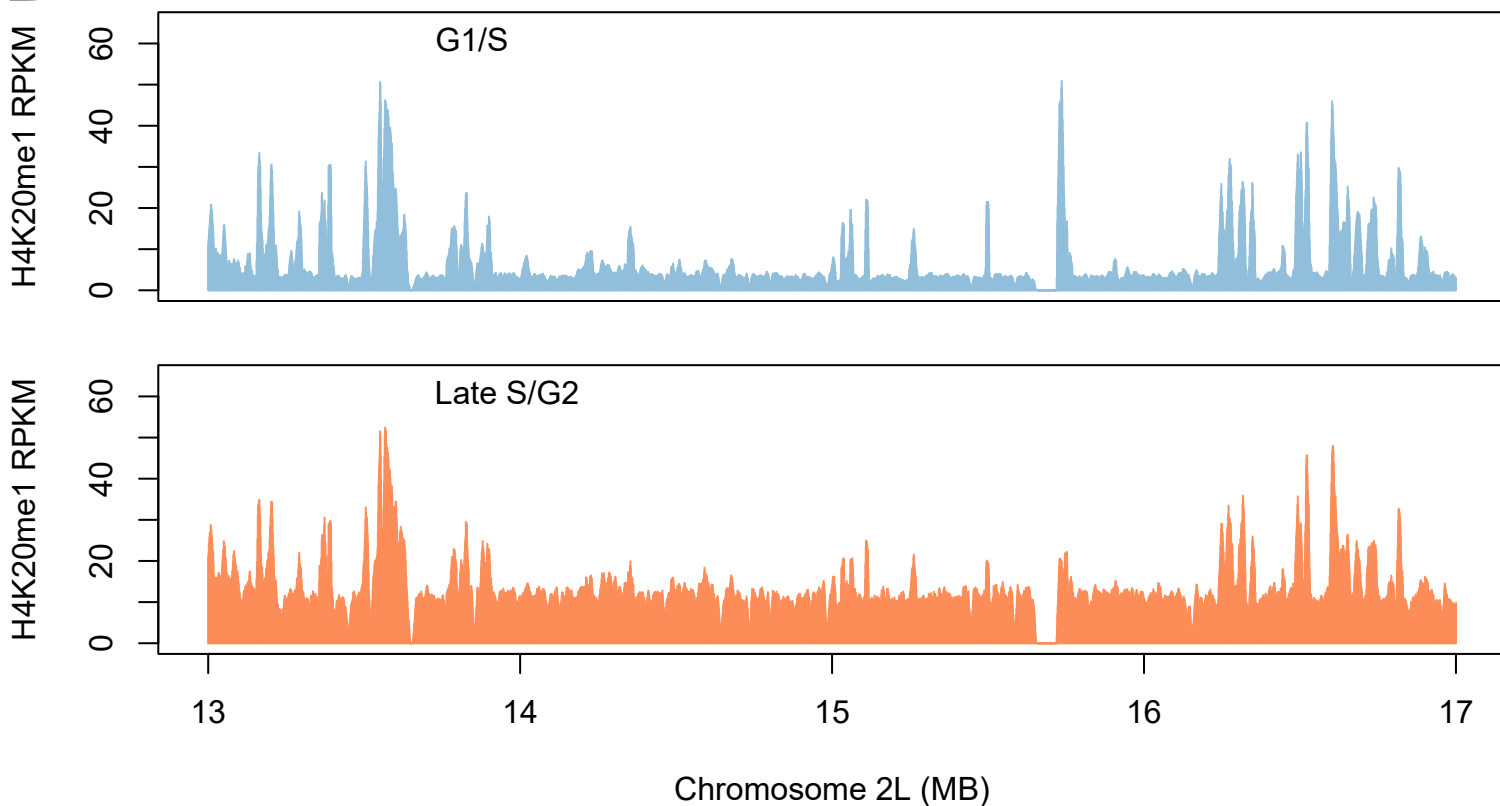

**C**

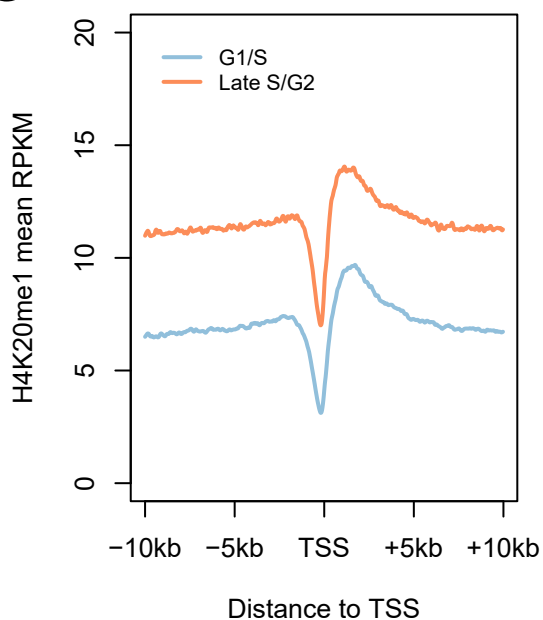

**D**

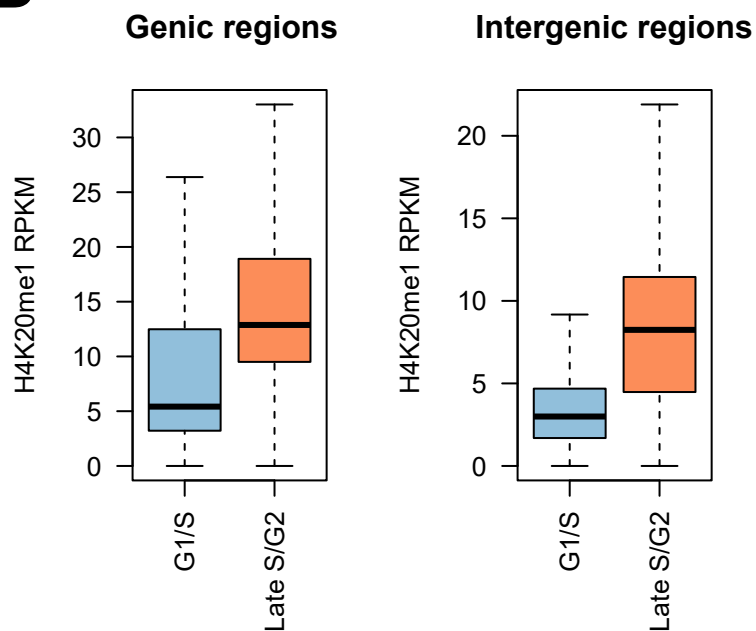

**A**

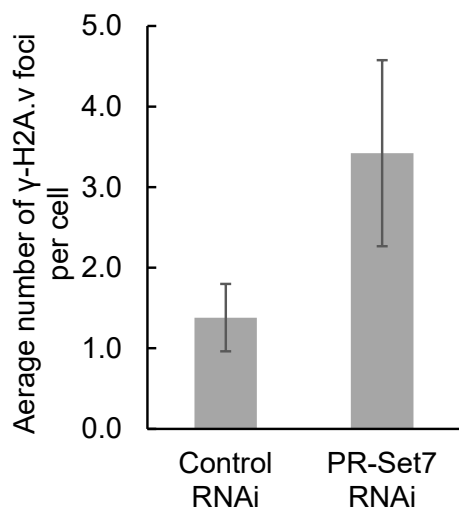

**B**

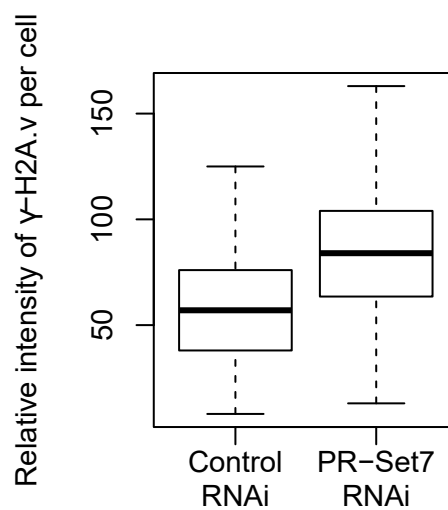

**C**

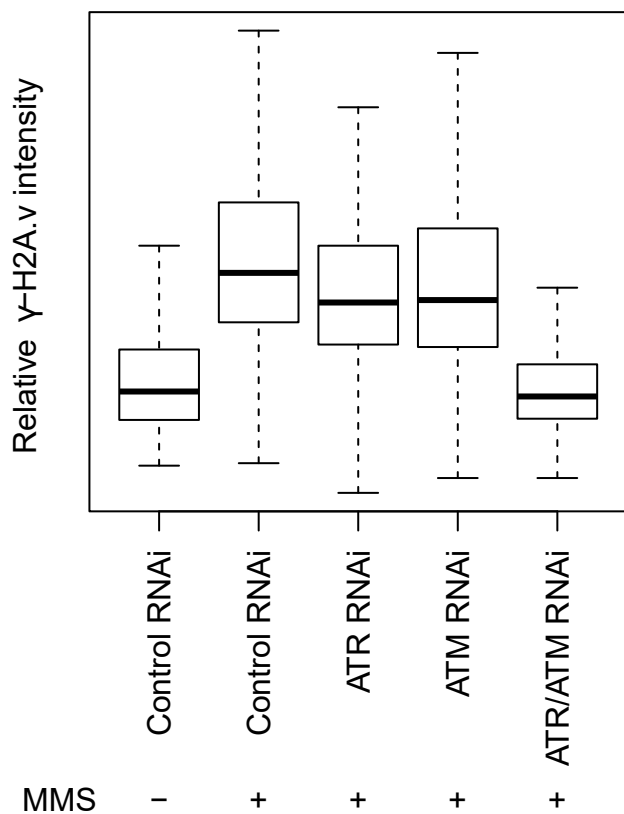



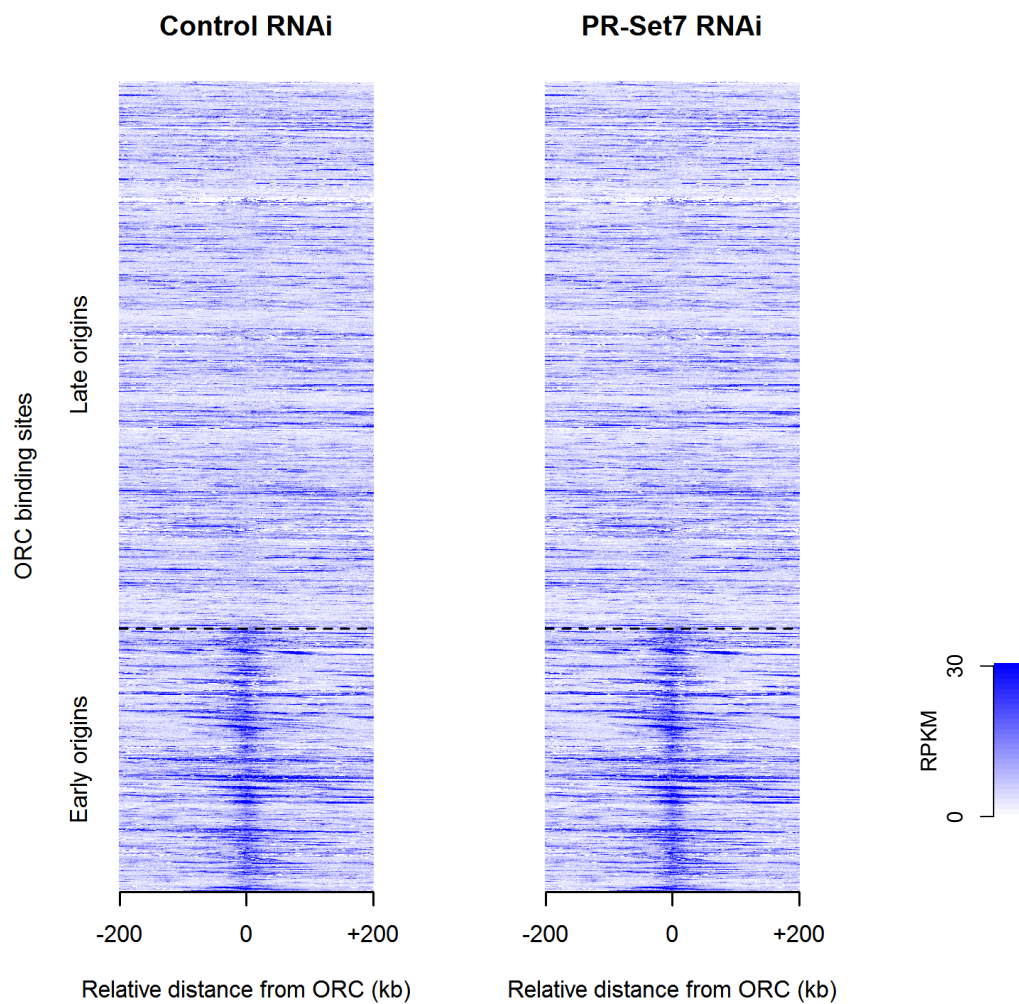

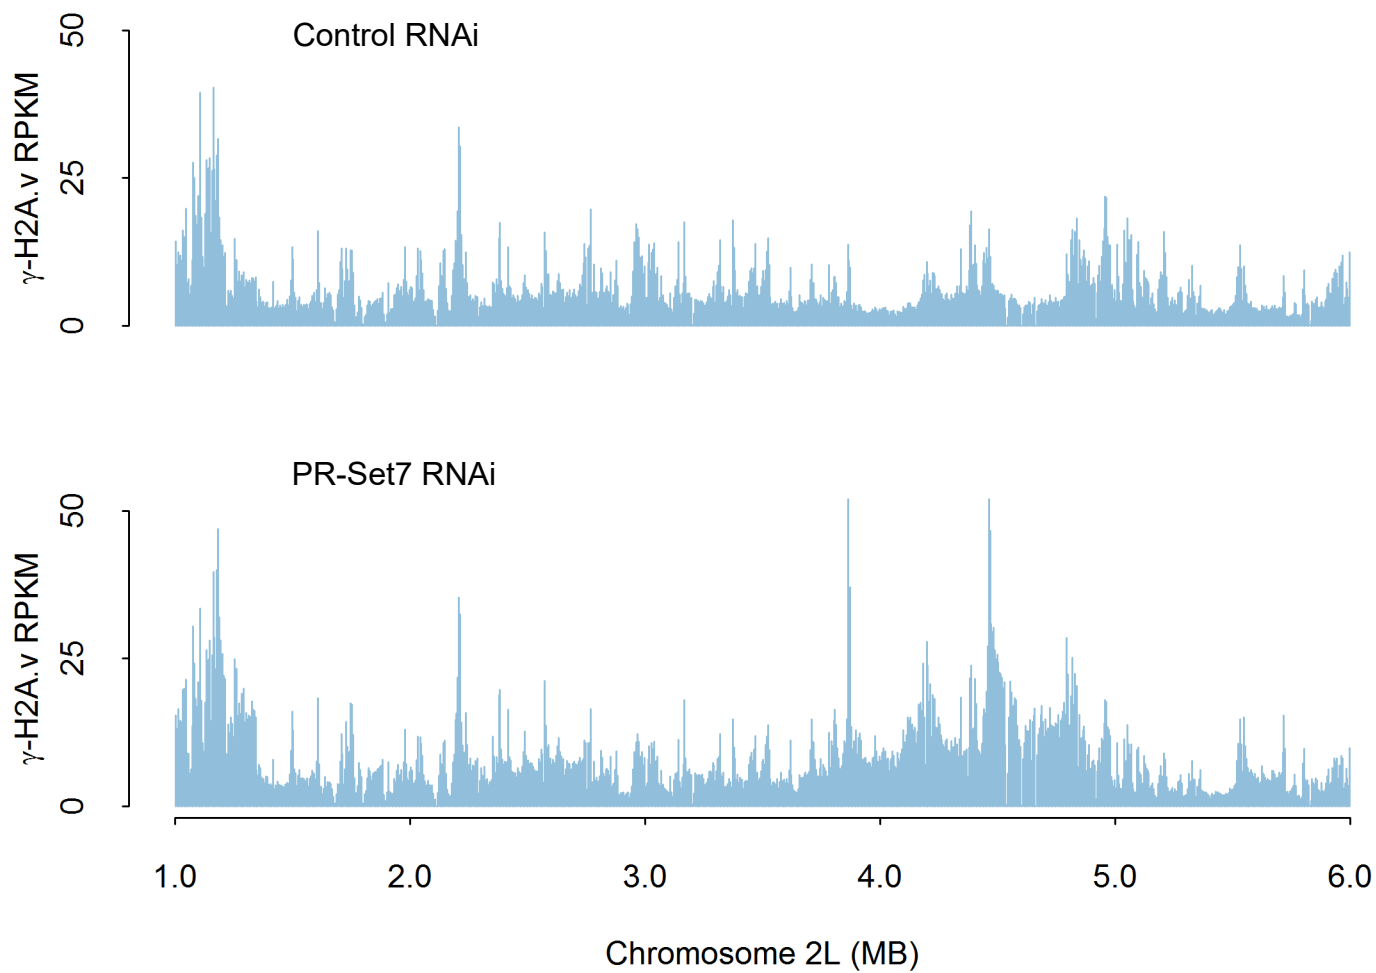

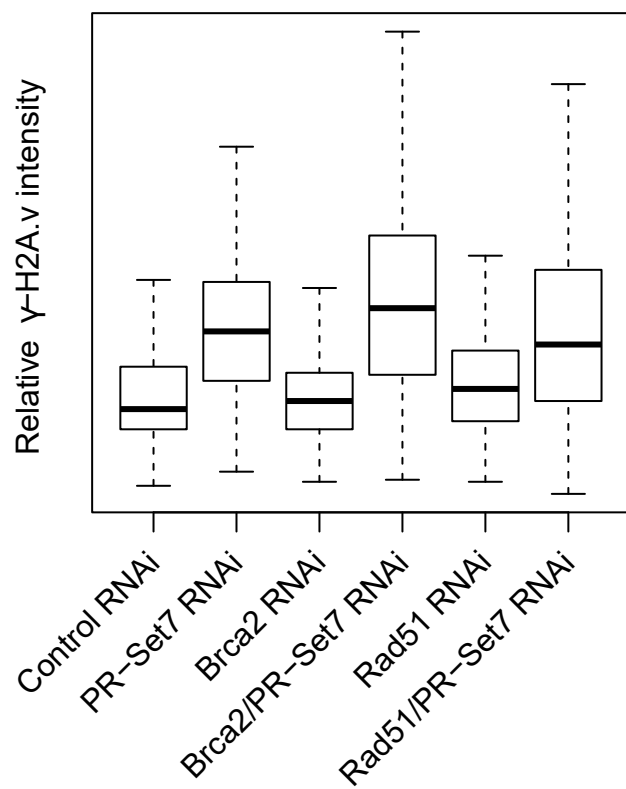

**Table S1. Chromosomal positions of late replicating domains and  $\gamma$ -H2A.v domains identified by HMM.**

|    | Late replicating domains |          |          | $\gamma$ -H2A.v domains |          |          |
|----|--------------------------|----------|----------|-------------------------|----------|----------|
|    | Chr                      | Start    | End      | Chr                     | Start    | End      |
| 1  | 2L                       | 627002   | 813000   | 2L                      | 580000   | 810000   |
| 2  | 2L                       | 1005002  | 1048000  | 2L                      | 900000   | 1080000  |
| 3  | 2L                       | 1258002  | 1350000  | 2L                      | 1170000  | 1590000  |
| 4  | 2L                       | 2406002  | 2648000  | 2L                      | 1730000  | 1910000  |
| 5  | 2L                       | 3839002  | 4200000  | 2L                      | 2220000  | 2730000  |
| 6  | 2L                       | 4268002  | 4326000  | 2L                      | 3620000  | 4880000  |
| 7  | 2L                       | 4457002  | 4793000  | 2L                      | 5520000  | 5850000  |
| 8  | 2L                       | 6148002  | 6294000  | 2L                      | 6100000  | 6340000  |
| 9  | 2L                       | 8806002  | 8864000  | 2L                      | 7500000  | 7800000  |
| 10 | 2L                       | 10069002 | 10138000 | 2L                      | 10510000 | 10950000 |
| 11 | 2L                       | 10601002 | 10842000 | 2L                      | 11240000 | 12000000 |
| 12 | 2L                       | 11318002 | 11787000 | 2L                      | 12100000 | 12440000 |
| 13 | 2L                       | 11831002 | 12002000 | 2L                      | 13900000 | 16270000 |
| 14 | 2L                       | 12135002 | 12362000 | 2L                      | 16850000 | 18540000 |
| 15 | 2L                       | 14087002 | 14178000 | 2L                      | 19190000 | 19360000 |
| 16 | 2L                       | 14419002 | 14486000 | 2L                      | 19570000 | 19750000 |
| 17 | 2L                       | 14540002 | 15011000 | 2L                      | 19820000 | 20070000 |
| 18 | 2L                       | 15090002 | 15239000 | 2L                      | 20440000 | 20650000 |
| 19 | 2L                       | 15281002 | 15654000 | 2L                      | 21750000 | 22070000 |
| 20 | 2L                       | 15779002 | 16221000 | 2R                      | 2940000  | 3130000  |
| 21 | 2L                       | 16962002 | 17339000 | 2R                      | 4610000  | 4780000  |
| 22 | 2L                       | 17517002 | 18105000 | 2R                      | 9450000  | 9710000  |
| 23 | 2L                       | 18181002 | 18409000 | 2R                      | 11270000 | 11410000 |
| 24 | 2L                       | 19835002 | 20110000 | 2R                      | 12230000 | 12430000 |
| 25 | 2L                       | 20223002 | 20372000 | 2R                      | 13030000 | 13280000 |
| 26 | 2L                       | 20488002 | 20573000 | 2R                      | 14730000 | 15040000 |
| 27 | 2L                       | 21795002 | 22112000 | 2R                      | 15360000 | 16150000 |
| 28 | 2R                       | 1683002  | 1791000  | 2R                      | 16210000 | 16790000 |
| 29 | 2R                       | 2396002  | 2454000  | 2R                      | 17630000 | 17970000 |
| 30 | 2R                       | 2957002  | 3086000  | 2R                      | 18570000 | 18700000 |
| 31 | 2R                       | 4185002  | 4322000  | 2R                      | 18820000 | 19260000 |
| 32 | 2R                       | 4622002  | 4799000  | 3L                      | 1870000  | 2390000  |
| 33 | 2R                       | 4837002  | 4972000  | 3L                      | 2840000  | 3050000  |
| 34 | 2R                       | 5533002  | 5724000  | 3L                      | 3600000  | 3820000  |
| 35 | 2R                       | 6187002  | 6296000  | 3L                      | 4410000  | 5750000  |
| 36 | 2R                       | 6844002  | 6899000  | 3L                      | 5880000  | 6120000  |
| 37 | 2R                       | 7357002  | 7423000  | 3L                      | 6210000  | 6920000  |
| 38 | 2R                       | 7605002  | 7723000  | 3L                      | 7010000  | 7130000  |
| 39 | 2R                       | 7953002  | 8008000  | 3L                      | 7390000  | 7730000  |
| 40 | 2R                       | 9524002  | 9679000  | 3L                      | 9130000  | 9340000  |
| 41 | 2R                       | 10534002 | 10641000 | 3L                      | 9850000  | 10640000 |
| 42 | 2R                       | 10910002 | 10965000 | 3L                      | 11790000 | 12040000 |

|    |    |          |          |    |          |          |
|----|----|----------|----------|----|----------|----------|
| 43 | 2R | 11280002 | 11369000 | 3L | 13030000 | 13260000 |
| 44 | 2R | 11457002 | 11670000 | 3L | 13360000 | 13920000 |
| 45 | 2R | 12245002 | 12425000 | 3L | 14180000 | 14480000 |
| 46 | 2R | 13828002 | 13889000 | 3L | 14780000 | 14980000 |
| 47 | 2R | 14057002 | 14157000 | 3L | 15300000 | 15490000 |
| 48 | 2R | 14750002 | 15022000 | 3L | 15690000 | 15950000 |
| 49 | 2R | 15414002 | 15580000 | 3L | 16230000 | 16350000 |
| 50 | 2R | 15667002 | 16094000 | 3L | 17020000 | 17430000 |
| 51 | 2R | 16244002 | 16491000 | 3L | 18100000 | 18670000 |
| 52 | 2R | 16552002 | 16869000 | 3L | 19080000 | 19390000 |
| 53 | 2R | 17696002 | 17930000 | 3L | 20530000 | 20710000 |
| 54 | 2R | 18120002 | 18181000 | 3L | 21670000 | 21820000 |
| 55 | 2R | 18710002 | 18761000 | 3L | 21940000 | 22260000 |
| 56 | 2R | 18851002 | 18929000 | 3L | 22400000 | 22720000 |
| 57 | 2R | 18972002 | 19237000 | 3R | 1610000  | 2200000  |
| 58 | 2R | 19322002 | 19435000 | 3R | 2270000  | 2580000  |
| 59 | 2R | 20278002 | 20386000 | 3R | 3030000  | 3740000  |
| 60 | 3L | 19810002 | 2147000  | 3R | 4170000  | 4360000  |
| 61 | 3L | 22030002 | 2350000  | 3R | 6700000  | 7030000  |
| 62 | 3L | 26860002 | 2731000  | 3R | 7830000  | 8070000  |
| 63 | 3L | 28620002 | 3064000  | 3R | 8540000  | 8820000  |
| 64 | 3L | 36400002 | 3760000  | 3R | 8860000  | 9150000  |
| 65 | 3L | 39550002 | 4008000  | 3R | 9210000  | 9400000  |
| 66 | 3L | 47200002 | 5094000  | 3R | 10710000 | 10920000 |
| 67 | 3L | 53810002 | 5569000  | 3R | 12940000 | 13440000 |
| 68 | 3L | 58380002 | 5887000  | 3R | 13550000 | 13880000 |
| 69 | 3L | 59470002 | 6068000  | 3R | 14500000 | 15590000 |
| 70 | 3L | 62930002 | 6878000  | 3R | 15700000 | 16110000 |
| 71 | 3L | 70170002 | 7113000  | 3R | 16140000 | 16370000 |
| 72 | 3L | 71560002 | 7234000  | 3R | 17890000 | 18200000 |
| 73 | 3L | 74460002 | 7716000  | 3R | 18610000 | 18870000 |
| 74 | 3L | 92040002 | 9293000  | 3R | 19170000 | 19550000 |
| 75 | 3L | 99210002 | 10203000 | 3R | 21120000 | 21340000 |
| 76 | 3L | 10508002 | 10582000 | 3R | 21970000 | 22630000 |
| 77 | 3L | 11835002 | 12045000 | 3R | 23100000 | 24630000 |
| 78 | 3L | 12586002 | 12663000 | 3R | 24750000 | 24860000 |
| 79 | 3L | 13060002 | 13187000 | 3R | 25100000 | 25480000 |
| 80 | 3L | 13573002 | 13799000 | 3R | 26390000 | 26570000 |
| 81 | 3L | 14310002 | 14370000 | 3R | 26850000 | 27030000 |
| 82 | 3L | 14846002 | 14962000 | 3R | 27270000 | 27410000 |
| 83 | 3L | 15358002 | 15418000 | 3R | 27630000 | 27770000 |
| 84 | 3L | 15740002 | 15786000 | X  | 2660000  | 2910000  |
| 85 | 3L | 15851002 | 15908000 | X  | 3070000  | 3180000  |
| 86 | 3L | 16247002 | 16330000 | X  | 4590000  | 5310000  |
| 87 | 3L | 17087002 | 17437000 | X  | 6250000  | 6430000  |
| 88 | 3L | 18201002 | 18584000 | X  | 7210000  | 7410000  |
| 89 | 3L | 19166002 | 19226000 | X  | 9240000  | 9390000  |

|     |    |          |          |   |          |          |
|-----|----|----------|----------|---|----------|----------|
| 90  | 3L | 19294002 | 19580000 | X | 9580000  | 10130000 |
| 91  | 3L | 20584002 | 20758000 | X | 10770000 | 11130000 |
| 92  | 3L | 20862002 | 20970000 | X | 11910000 | 12400000 |
| 93  | 3L | 21056002 | 21125000 | X | 12670000 | 13020000 |
| 94  | 3L | 21644002 | 21805000 | X | 13310000 | 13470000 |
| 95  | 3L | 21977002 | 22246000 | X | 13880000 | 14920000 |
| 96  | 3L | 22453002 | 22702000 | X | 15020000 | 15190000 |
| 97  | 3L | 24280002 | 24398000 | X | 17860000 | 18140000 |
| 98  | 3R | 1667002  | 2164000  | X | 19800000 | 20280000 |
| 99  | 3R | 2332002  | 2586000  | X | 20370000 | 20910000 |
| 100 | 3R | 2650002  | 2839000  | X | 21320000 | 21430000 |
| 101 | 3R | 3059002  | 3300000  | X | 21620000 | 21700000 |
| 102 | 3R | 3400002  | 3594000  | X | 21910000 | 22440000 |
| 103 | 3R | 3635002  | 3710000  |   |          |          |
| 104 | 3R | 6260002  | 6576000  |   |          |          |
| 105 | 3R | 6732002  | 6982000  |   |          |          |
| 106 | 3R | 7107002  | 7346000  |   |          |          |
| 107 | 3R | 7923002  | 8153000  |   |          |          |
| 108 | 3R | 8361002  | 8424000  |   |          |          |
| 109 | 3R | 8600002  | 8800000  |   |          |          |
| 110 | 3R | 8918002  | 9068000  |   |          |          |
| 111 | 3R | 9207002  | 9408000  |   |          |          |
| 112 | 3R | 9667002  | 9767000  |   |          |          |
| 113 | 3R | 10755002 | 10937000 |   |          |          |
| 114 | 3R | 11566002 | 11609000 |   |          |          |
| 115 | 3R | 12317002 | 12449000 |   |          |          |
| 116 | 3R | 12491002 | 12785000 |   |          |          |
| 117 | 3R | 12983002 | 13191000 |   |          |          |
| 118 | 3R | 13271002 | 13337000 |   |          |          |
| 119 | 3R | 13648002 | 13966000 |   |          |          |
| 120 | 3R | 15055002 | 15413000 |   |          |          |
| 121 | 3R | 15867002 | 16066000 |   |          |          |
| 122 | 3R | 16176002 | 16367000 |   |          |          |
| 123 | 3R | 17910002 | 18226000 |   |          |          |
| 124 | 3R | 18634002 | 18819000 |   |          |          |
| 125 | 3R | 19224002 | 19471000 |   |          |          |
| 126 | 3R | 20204002 | 20304000 |   |          |          |
| 127 | 3R | 20776002 | 20826000 |   |          |          |
| 128 | 3R | 20971002 | 21039000 |   |          |          |
| 129 | 3R | 21187002 | 21263000 |   |          |          |
| 130 | 3R | 22132002 | 22244000 |   |          |          |
| 131 | 3R | 22390002 | 22522000 |   |          |          |
| 132 | 3R | 23177002 | 23375000 |   |          |          |
| 133 | 3R | 23428002 | 23735000 |   |          |          |
| 134 | 3R | 23900002 | 24048000 |   |          |          |
| 135 | 3R | 24195002 | 24338000 |   |          |          |
| 136 | 3R | 24481002 | 24610000 |   |          |          |

|     |    |          |          |  |  |  |
|-----|----|----------|----------|--|--|--|
| 137 | 3R | 24720002 | 24828000 |  |  |  |
| 138 | 3R | 25210002 | 25529000 |  |  |  |
| 139 | 3R | 26316002 | 26505000 |  |  |  |
| 140 | 3R | 26910002 | 27013000 |  |  |  |
| 141 | X  | 2747002  | 2791000  |  |  |  |
| 142 | X  | 3910002  | 3981000  |  |  |  |
| 143 | X  | 4301002  | 4409000  |  |  |  |
| 144 | X  | 4652002  | 4817000  |  |  |  |
| 145 | X  | 4892002  | 5170000  |  |  |  |
| 146 | X  | 5900002  | 6067000  |  |  |  |
| 147 | X  | 7284002  | 7375000  |  |  |  |
| 148 | X  | 8190002  | 8255000  |  |  |  |
| 149 | X  | 9273002  | 9387000  |  |  |  |
| 150 | X  | 9630002  | 10122000 |  |  |  |
| 151 | X  | 10768002 | 10955000 |  |  |  |
| 152 | X  | 11994002 | 12289000 |  |  |  |
| 153 | X  | 13375002 | 13448000 |  |  |  |
| 154 | X  | 13954002 | 14078000 |  |  |  |
| 155 | X  | 14204002 | 14532000 |  |  |  |
| 156 | X  | 14588002 | 14654000 |  |  |  |
| 157 | X  | 15058002 | 15157000 |  |  |  |
| 158 | X  | 17172002 | 17370000 |  |  |  |
| 159 | X  | 17811002 | 17949000 |  |  |  |
| 160 | X  | 18028002 | 18144000 |  |  |  |
| 161 | X  | 18859002 | 18915000 |  |  |  |
| 162 | X  | 19852002 | 20037000 |  |  |  |
| 163 | X  | 20101002 | 20249000 |  |  |  |
| 164 | X  | 20423002 | 20877000 |  |  |  |
| 165 | X  | 21335002 | 21456000 |  |  |  |
| 166 | X  | 22028002 | 22211000 |  |  |  |

**Table S2. Primer sequences used for generating dsRNAs.**

| dsRNA Target     | Forward Primer        | Reverse Primer          |
|------------------|-----------------------|-------------------------|
| PR-Set7          | CACAATGATGGCACACAACA  | TTCGAAGCTCCGATTGATCT    |
| Suv4-20          | CTACGGCGAGGACTTCTTTG  | CTTTTCGAGCAAAGAGACGG    |
| ATR              | CGACATGGACACAAAATGG   | TTTGGGTAAGCACTTGGACC    |
| ATM              | GCGTTCTGCTGGAAGATG    | GCTCATCCAAACTAGCGTAA    |
| Rad51            | CTCGCACCTTCTATCAAATG  | CATCGGCCAGGCGTTG        |
| Brea2            | CGACGAAATGGCCAAAATAT  | CCTGCCTTGCTTCGGTT       |
| Control (pUC119) | GCGCGGAACCCCTATTTGTTA | GGAAGCTAGAGTAAGTAGTTCGC |
